1 **Slow delivery immunization enhances HIV neutralizing antibody and germinal**  
2 **center responses via modulation of immunodominance**

3  
4 Kimberly M. Cirelli<sup>1,2</sup>, Diane G. Carnathan<sup>2,3,4</sup>, Bartek Nogal<sup>2,5</sup>, Oscar L. Rodriguez<sup>6</sup>, Jacob T. Martin<sup>2,7</sup>,  
5 Amit A. Upadhyay<sup>3</sup>, Chiamaka A. Enemu<sup>3,4</sup>, Etse H. Gebru<sup>3,4</sup>, Yury Choe<sup>3,4</sup>, Federico Viviano<sup>3,4</sup>,  
6 Catherine Nakao<sup>1</sup>, Matthias Pauthner<sup>2,8</sup>, Samantha Reiss<sup>1,2</sup>, Christopher A. Cottrell<sup>2,5</sup>, Raiza Bastidas<sup>2,8</sup>,  
7 William Gibson<sup>9</sup>, Amber N. Wolabaugh<sup>3</sup>, Mariane B. Melo<sup>2,7</sup>, Benjamin Cosette<sup>7</sup>, Venkatesh Kuman<sup>10</sup>,  
8 Nirav Patel<sup>11</sup>, Talar Tokatlian<sup>2,7</sup>, Sergey Menis<sup>2,8</sup>, Daniel W. Kulp<sup>2,8,12</sup>, Dennis R. Burton<sup>2,8,13</sup>, Ben Murrell<sup>10</sup>,  
9 Steven E. Bosinger<sup>3,11</sup>, William R. Schief<sup>2,8,13</sup>, Andrew B. Ward<sup>2,5</sup>, Corey T. Watson<sup>9</sup>, Guido Silvestri<sup>2,3,4</sup>,  
10 Darrell J. Irvine<sup>2,7,13,14</sup>, Shane Crotty<sup>1,2,10\*</sup>

11  
12 <sup>1</sup> Division of Vaccine Discovery, La Jolla Institute for Allergy and Immunology (LJI), La Jolla, CA 92037, USA

13 <sup>2</sup> Center for HIV/AIDS Vaccine Immunology and Immunogen Discovery (Scripps CHAVI-ID), The Scripps Research  
14 Institute, La Jolla, CA 92037, USA

15 <sup>3</sup> Yerkes National Primate Research Center, Emory University, Atlanta, GA 30322, USA

16 <sup>4</sup> Emory Vaccine Center, Emory University School of Medicine, Atlanta, GA 30322, USA

17 <sup>5</sup> Department of Integrative Structural and Computational Biology, The Scripps Research Institute, La Jolla, CA  
18 92037, USA

19 <sup>6</sup> Department of Genetics and Genomic Sciences, Icahn School of Medicine at Mount Sinai, New York, NY 10029,  
20 USA

21 <sup>7</sup> Koch Institute for Integrative Cancer Research, Massachusetts Institute of Technology, Cambridge, MA 02139, USA

22 <sup>8</sup> Department of Immunology and Microbiology, The Scripps Research Institute, La Jolla, CA 92037, USA

23 <sup>9</sup> Department of Biochemistry and Molecular Genetics, University of Louisville School of Medicine, Louisville, KY  
24 40202, USA

25 <sup>10</sup> Department of Medicine, University of California, San Diego, La Jolla, CA 92037, USA

26 <sup>11</sup> Yerkes NHP Genomics Core Laboratory, Yerkes National Primate Research Center, Atlanta, GA 30329, USA

27 <sup>12</sup> Vaccine and Immunotherapy Center, Wistar Institute, Philadelphia, PA 19104, USA

28 <sup>13</sup> Ragon Institute of Massachusetts General Hospital, Massachusetts Institute of Technology, and Harvard University,  
29 Cambridge MA 02139, USA

30 <sup>14</sup> Departments of Biological Engineering and Materials Science & Engineering, Massachusetts Institute of  
31 Technology, Cambridge MA 02139, USA

32 \* Corresponding author.

33 Correspondence: shane@lji.org

34

## 35 **SUMMARY**

36 The observation that humans can produce broadly neutralizing antibodies (bnAbs) against HIV-1 has  
37 generated enthusiasm about the potential for a bnAb vaccine against HIV-1. Conventional immunization  
38 strategies will likely be insufficient for the development of a bnAb HIV vaccine and vaccines to other  
39 difficult pathogens, due to the significant immunological hurdles posed, including B cell  
40 immunodominance and germinal center (GC) quantity and quality. Using longitudinal lymph node fine  
41 needle aspirates, we found that two independent methods of slow delivery immunization of rhesus  
42 macaques (RM) resulted in larger GCs, more robust and sustained GC Tfh cell responses, and GC B cells  
43 with improved Env-binding, which correlated with the development of ~20 to 30-fold higher titers of tier  
44 2 HIV-1 nAbs. Using a new RM genomic immunoglobulin loci reference sequence, we identified  
45 differential IgV gene usage between slow delivery immunized and conventional bolus immunized  
46 animals. The most immunodominant IgV gene used by conventionally immunized animals was  
47 associated with many GC B cell lineages. Ab mapping of those GC B cell specificities demonstrated  
48 targeting of an immunodominant non-neutralizing trimer base epitope, while that response was muted  
49 in slow delivery immunized animals. Thus, alternative immunization strategies appear to enhance nAb  
50 development by altering GCs and modulating immunodominance of non-neutralizing epitopes.

51

## 52 **KEYWORDS**

53 HIV vaccine, non-human primates, GC B cells, Tfh cells, immunodominance, germinal centers, rhesus  
54 macaque genome

55

## 56 **INTRODUCTION**

57 A majority of licensed vaccines provide protection through the induction of protective  
58 antibodies (Plotkin, 2010). The isolation of HIV-1 broadly neutralizing antibodies (bnAbs) from numerous  
59 HIV-infected individuals, combined with passive transfer studies demonstrating that HIV-1 bnAbs can  
60 protect non-human primates (NHPs) from SHIV infections, supports the feasibility of an antibody-based  
61 HIV vaccine (Burton and Hangartner, 2016; Nishimura and Martin, 2017). Elicitation of neutralizing  
62 antibodies (nAbs) against clinically relevant HIV-1 strains (i.e., tier 2 and tier 3 strains) by immunization,  
63 however, has been very difficult (Montefiori et al., 2018). Much of that challenge centers on structural  
64 features of HIV-1 envelope (Env); those structural features have complex and incompletely understood  
65 immunological implications. HIV-1 Env consists of gp120 and gp41 components that form a trimeric

66 spike that is the only surface protein on HIV-1 virions and thus is the only possible target for nAbs (Burton  
67 and Hangartner, 2016). Immunization of humans with monomeric HIV-1 gp120 has repeatedly failed to  
68 elicit tier 2 nAbs in candidate HIV-1 vaccine clinical trials (Haynes et al., 2012; Mascola et al., 1996; Rerks-  
69 Ngarm et al., 2009). The reasons for that are not intuitively obvious, as nAb epitopes are present on  
70 monomeric gp120. Immunodominance of non-neutralizing epitopes is one possible explanation  
71 (Havenar-Daughton et al., 2017). After decades of effort, key protein design developments have been  
72 made in recent years to accomplish expression of soluble native-like HIV-1 Env trimers (Julien et al.,  
73 2013; Kulp et al., 2017; Lyumkis et al., 2013; Sanders et al., 2013). In contrast to gp120, immunization  
74 with native-like Env trimers elicited substantial strain-specific tier 2 nAbs in rabbits and guinea pigs (Feng  
75 et al., 2016; Sanders et al., 2015). However, immunization with native-like Env trimers failed to elicit tier  
76 2 nAbs in mice (Hu et al., 2015), and Env trimer immunizations of NHPs have only been sporadically  
77 successful (Havenar-Daughton et al., 2016a; Pauthner et al., 2017; Sanders et al., 2015; Zhou et al.,  
78 2017). For some immunization regimes in NHPs, tier 2 nAbs have been reliably elicited within 10 weeks  
79 of Env trimer immunization (Pauthner et al., 2017), which compares favorably with the speed of tier 2  
80 nAb development in HIV infected individuals (Richman et al., 2003; Wei et al., 2003). Thus, while nAb  
81 epitopes are clearly presented on native-like Env trimers, the immunological parameters controlling the  
82 development of nAbs to the Env trimer remain to be elucidated. These immunological parameters are  
83 also likely important for nAbs to other pathogens.

84        Germinal centers (GCs) are essential for HIV-1 nAb development, as HIV-1 nAb development  
85 requires antibody (Ab) somatic hypermutation (SHM) (Klein et al., 2013; West et al., 2014). GCs are sites  
86 where B cells compete for antigen and undergo repeated rounds of SHM of their BCRs and selection by  
87 GC T follicular helper cells (Tfh) to evolve high affinity Abs (Crotty, 2014; Mesin et al., 2016). B cells with  
88 higher affinity to antigen present more peptide:MHC complexes to GC Tfh cells and in turn receive more  
89 help (Crotty, 2014; Gitlin et al., 2014; Victora et al., 2010). GC Tfh help signals to GC B cells result in  
90 proliferation and further BCR mutation (Gitlin et al., 2015). Additional parameters may also regulate  
91 competition in GCs and rates of SHM. Tfh help quality was associated with HIV nAb development in Env  
92 trimer immunized rhesus macaque monkeys (RM) (Havenar-Daughton et al., 2016a). In HIV-infected  
93 humans, frequencies of highly functional memory Tfh cells in blood were associated with bnAb  
94 development (Locci et al., 2013; Moody et al., 2016). HIV-specific circulating Tfh (cTfh) were positively  
95 correlated with total HIV-specific Ab development (Baiyegunhi et al., 2018). GC Tfh cells were also  
96 positively correlated with nAb development in SIV<sup>+</sup> RMs and SHIV<sup>+</sup> RMs (Chowdhury et al., 2015;

97 Petrovas et al., 2012; Yamamoto et al., 2015).

98 Affinity maturation is only one component of nAb development. B cell responses to protein  
99 antigens are polyclonal, targeting epitopes across an antigen. The composition of the antigen-specific  
100 B cell repertoire responding to even a single protein can be complex. The responding B cells initially  
101 engage in interclonal competition, and then the B cells develop numerous GCs and engage in  
102 interclonal and intracloal competition, resulting in complex outcomes (Kuraoka et al., 2016; Tas et al.,  
103 2016). Theoretically, the entire surface of any protein represents a continuum of B cell epitopes. In  
104 reality, the Ab response to a protein predominantly targets a limited number of epitopic sites. This  
105 phenomenon is well described for influenza HA, and the epitopes are recognized in a hierarchical  
106 manner (Angeletti and Yewdell, 2018; Angeletti et al., 2017). Immunodominance is the phenomenon in  
107 which B cells that recognize an epitopic site dominate an immune response at the expense of B cells  
108 that recognize other sites. Immunodominance can occur due to differences in B cell precursor  
109 frequencies and affinities (Abbott et al., 2018; Havenar-Daughton et al., 2017; Jardine et al., 2016) and  
110 appears to be a key immunological process limiting the development of broad nAb responses to  
111 influenza (Andrews et al., 2018; Angeletti and Yewdell, 2018; Angeletti et al., 2017; Vitoria and Wilson,  
112 2015). Immunodominance may also be important for the development of nAbs against refractory  
113 pathogens, including HIV-1. Evidence of immunodominance impairing HIV nAb development includes  
114 the lack of tier 2 nAb responses by humans immunized with Env gp120, the lack of tier 2 nAb responses  
115 in RMs immunized with non-native Env trimers, the sporadic nature of tier 2 nAb development in RMs,  
116 and the role of immunodominance in the response of rare or low affinity HIV CD4-binding-site specific  
117 B cells in a mouse model (Abbott et al., 2018; Havenar-Daughton et al., 2017; 2018).

118 Much of the focus in HIV vaccine development is on the choice of antigen and adjuvant, but an  
119 orthogonal parameter is the kinetics of the availability of the antigen. Slow, or sustained, delivery  
120 immunization is a conceptually attractive vaccine strategy because it more closely mimics a natural self-  
121 limiting acute infection (Cirelli and Crotty, 2017). While the adjuvanticity of alum has been believed to  
122 be in part due to a 'depot' effect of sustained antigen availability, many antigens rapidly elute from alum  
123 in vivo (Hogenesch, 2002; Shi et al., 2001; Weissburg et al., 1995) and several studies reported that the  
124 depot attribute of alum did not affect Ab responses (Hogenesch, 2012; Hutchison et al., 2012; Noe et  
125 al., 2010), suggesting that alum adjuvanticity does not primarily function via a slow antigen release  
126 mechanism. In contrast, two-week slow release immunization using nonmechanical osmotic minipumps  
127 and a soluble adjuvant resulted in enhanced GC B and Tfh cell responses in mouse models (Hu et al.,

128 2015; Tam et al., 2016). Two-week dose escalation immunization using a soluble adjuvant resulted in  
129 similar outcomes and enhanced deposition of immune complexes onto follicular dendritic cells (FDC)  
130 (Tam et al., 2016).

131 Current understanding of the relative importance of different aspects of B and T cell biology in  
132 the development of HIV nAbs has been limited by the fact the wildtype mice do not develop tier 2 HIV  
133 nAbs in response to Env trimer immunization. While NHPs are important animal models for HIV vaccine  
134 design because of their close evolutionary relationship to humans, it has been very difficult to study the  
135 early response to Env in NHPs, and humans, due to the inaccessible nature of lymph nodes (LN) and the  
136 low frequencies of Env-specific B cells in response to a primary immunization. In a first NHP slow release  
137 vaccine study, six RMs were immunized with soluble native-like Env trimers in a soluble ISCOMs-class  
138 saponin adjuvant delivered via nonmechanical osmotic pumps to test the concept of slow release  
139 immunization (Pauthner et al., 2017). The minipump immunized animals responded with the most robust  
140 tier 2 nAb responses of any of the groups of animals immunized. Tier 2 nAb responses were developed  
141 by wk10 in all minipump immunized RMs. The rapidity and peak magnitude of the tier 2 nAb response  
142 suggested that improved affinity maturation, altered B cell lineage recruitment, enhanced Env-specific  
143 Tfh cell responses, or other factors may be responsible for the improved nAb response. Antigen-specific  
144 B cell and Tfh cells were not examined.

145 We considered that comparison of the primary B and T cell responses in the draining LNs of  
146 osmotic minipump immunized RMs and conventionally immunized RMs may provide insights into the  
147 immunological causes of the difficulty in eliciting B cell responses capable of neutralizing tier 2 HIV  
148 strains, which may also be applicable to other difficult-to-neutralize pathogens. Here we have examined  
149 the early B and T cell response to HIV Env trimers in RMs using new tools and comparative immunology  
150 between conventional and slow release vaccine concepts to gain insights into the development of nAbs.

151

## 152 **RESULTS**

### 153 **Env-specific GC responses are more robust upon slow release immunization**

154 Three groups of RMs were immunized with soluble native-like Env trimer BG505 Olio6-CD4ko  
155 (Kulp et al., 2017) protein in a soluble ISCOMs-class saponin adjuvant. Three delivery strategies were  
156 tested: conventional bolus immunization via subcutaneous (SubQ) needle injection (n = 9), two-week  
157 SubQ nonmechanical osmotic minipumps (n = 4) and four-week SubQ nonmechanical osmotic  
158 minipumps (n = 4) (**Fig 1A**). All immunizations were given bilaterally in left and right thighs. To determine

159 the kinetics of the GC response to primary immunization, longitudinal LN fine needle aspirates (FNA)  
160 were employed. LN FNAs were used to sample the draining inguinal LNs weekly in both the left and  
161 right leg. Previous work demonstrated that LN FNAs well represented the cellular composition of the  
162 whole LN and were well tolerated (Havenar-Daughton et al., 2016a). This study is the first longitudinal  
163 (i.e., same individuals sampled) weekly kinetic analysis of a GC response in any species.

164 GCs developed slower than expected after conventional bolus immunization, based on  
165 comparison to mouse data of LN GC kinetics after protein immunization, with almost no GC B cells  
166 ( $Bcl6^{+}Ki67^{+}$  or  $CD38^{-}CD71^{+}$  of  $CD20^{+}CD3^{-}$ ) detectable at day 7 (d7) postimmunization (**Fig 1B-C, S1A -**  
167 **B**). Substantially greater GC B cell frequencies were present at d14 (d7 v d14,  $p=0.0015$ ). No differences  
168 were observed in GC kinetics between the two osmotic pump groups, so all data from those animals  
169 have been pooled in subsequent analyses ( $n = 8$  animals;  $n = 16$  LN FNAs per time point. **Fig S1C-D**).  
170 Total GC B cells in the draining LNs peaked at week 7 (w7) in pump-immunized animals after a single  
171 immunization, substantially later than after bolus immunization (**Fig 1C**). Pump-immunized animals had  
172 significantly more GC B cells throughout the first immunization ( $p = 0.017$  [Area under the curve (AUC)].  
173 **Fig 1D, S1D**).

174 Given that RMs are not kept in a sterile environment, interpretation of GC B cell kinetics, in the  
175 absence of antigen-specific probes, is confounded by uncertainty regarding the antigenic targets of the  
176 GCs. In previous studies, total GC B cell responses were measured, but antigen-specificity was not  
177 determined (Havenar-Daughton et al., 2016a; Pauthner et al., 2017). Detection of antigen-specific GC B  
178 cells is a particular challenge, as GC B cells express less BCR than non-GC B cells (**Fig S1E**). Here, using  
179 BG505 Oligo6 Env trimers conjugated to two fluorochromes as two separate and complementary Env  
180 trimer probes ( $Env_{A647}$  and  $Env_{BV421}$ ), we measured the kinetics and magnitude of the Env trimer-specific  
181 B and GC B cell response ( $Env_{A647}^{+}Env_{BV421}^{+}Bcl6^{+}Ki67^{+}$  or  $CD38^{-}CD71^{+}$  of  $CD20^{+}CD3^{-}$ ) (**Fig 1E-O, S1F-**  
182 **N**). This method is specific, with little experimental 'noise', as naive B cells and GC B cells from  
183 unimmunized animals did not bind these probes (**Fig 1E, H, M, S1G, S1K, Table S1-2**). Despite  
184 observing considerable GCs at weeks 2-3, Env-specific GC B cells with detectable affinity to the probes  
185 were rare at weeks 2-3 (**Fig 1I-K, S1G**). Antigen-specific B and GC B cells in draining LNs of bolus  
186 immunized animals were consistently detectable at w4. Env-specific GC B cell frequencies were relatively  
187 stable between weeks 4-8 in bolus immunized animals, indicating active GC responses for at least two  
188 months after a single protein immunization (**Fig 1I, 1K**).

189 In minipump-immunized animals, frequencies of Env-specific GC B cells increased over time ( $p$

190 = 0.0064 compared to bolus as Env<sup>+</sup> % of GC B cells over time [AUC], and  $p = 0.0001$  compared to bolus  
191 as Env<sup>+</sup> GC B cell % of total B cells over time [AUC]. **Fig 1H-L**. Enhanced GC B cell binding of Env by  
192 pump immunized animals was not due to an increase in BCR expression (**Fig S1H**). MFI of B cell binding  
193 to Env can be used as a surrogate metric of binding affinity (**Fig 1M, S1I, S1J**). High affinity Env-specific  
194 GC B cells became much more abundant in minipump immunized animals over time ( $p < 0.0001$   
195 compared to bolus over time [AUC], **Fig 1N-O, S1I-N**), suggesting that osmotic minipump vaccine  
196 administration resulted in more affinity maturation compared to conventional bolus immunization.

197 Env trimer-specific memory B cells (Bcl6<sup>+</sup> Ki67<sup>-</sup> or CD38<sup>+</sup> CD71<sup>-</sup> Env<sub>Ax647</sub><sup>+/hi</sup> Env<sub>BV421</sub><sup>+/hi</sup> CD20<sup>+</sup>  
198 cells) developed in draining LNs in response to conventional or slow release immunization (**Fig 1P-Q,**  
199 **S1O-P**). Minipump immunized animals developed significantly higher frequencies of high affinity Env  
200 trimer-specific memory B cells (**Fig 1P-Q**). Overall, these GC and memory B cell data demonstrate that  
201 slow immunization delivery resulted in more robust GCs and indicated substantially greater affinity  
202 maturation to Env after a single immunization than occurred upon conventional bolus immunization.

203

#### 204 **Slow release osmotic minipumps enhance Env-specific GC Tfh cell responses**

205 While total GC Tfh cell (CXCR5<sup>+</sup> PD1<sup>hi</sup> of CD4<sup>+</sup> CD8<sup>-</sup>) frequencies were significantly increased in  
206 pump animals at several time points during the first immunization, overall GC Tfh cells did not differ  
207 between groups (**Fig 2A-C, S2A**). The specificity of GC Tfh at these time points could not be measured  
208 due to limited cell number recoveries and experimental prioritization of the B cell assays.

209 Based on previous immunization regimens (Pauthner et al., 2017), we administered a 2<sup>nd</sup> Env  
210 trimer immunization at w8 (**Fig 3A**). For minipump immunized animals, the immunization was split evenly  
211 between osmotic pumps and a bolus administered at the end of pump delivery to simulate an escalating  
212 dose immunization. We hypothesized that a bolus immunization at the end of the slow release delivery  
213 may enhance plasma cell differentiation and Ab titers. The total dose of Env trimer was matched between  
214 groups (100 $\mu$ g, **Fig 3A**). Draining LN GC responses observed after the 2<sup>nd</sup> immunization were relatively  
215 flat (**Fig 3B**), perhaps because the GC responses were already well above baseline immediately prior to  
216 the 2<sup>nd</sup> immunization (**Fig 1C, 3B**), though other explanations are also possible (see Discussion).  
217 Minipump immunized animals had significantly larger GC B responses at w14 (**Fig 3B**). Env-specific B  
218 and GC B cell frequencies of bolus immunized animals increased after the 2<sup>nd</sup> immunization (**Fig 3C-F**).  
219 High affinity Env-specific GC B cell recall responses were largely comparable between slow release  
220 immunized animals and bolus immunized animals (**Fig 3F**). Overall, kinetics of the secondary GC

221 responses differed from those in the primary GC responses.

222 Total GC Tfh cell frequencies were similar in response to the 2<sup>nd</sup> Env trimer immunization (**Fig**  
223 **3G-H**). To identify Env-specific GC Tfh cells, we performed cytokine-agnostic activation induced marker  
224 (AIM) flow cytometry assays with biopsied LN cells (Dan et al., 2016; Havenar-Daughton et al., 2016b;  
225 Reiss et al., 2017). Higher frequencies of Env-specific CD4<sup>+</sup> T cells were present in slow release  
226 immunized animals compared to bolus immunized animals (**Fig 3I-J, S2B**). The Env-specific CD4<sup>+</sup> T cell  
227 response enhancement was selective to Env-specific GC Tfh cells (**Fig 3K-M**). In conclusion, slow release  
228 immunization delivery elicited an immune response that generated substantially more Env-specific GC  
229 Tfh cells, commensurate with the development of significantly higher frequencies of high affinity Env-  
230 specific GC B cells.

231

### 232 **Slow release osmotic pump delivery enhances humoral responses**

233 Antibody responses to the different immunization approaches were examined, in light of the  
234 differential GC responses detected. A single bolus immunization failed to elicit detectable BG505 Env  
235 trimer-specific serum IgG titers, (**Fig 4A, S3A-B**). In contrast, a single slow release minipump  
236 immunization elicited modest but significant Env trimer-specific plasma IgG titers (w7, p = 0.048). The  
237 Olio6-CD4ko Env trimer design included a His tag; the tag elicited a strong anti-His Ab response after a  
238 single minipump immunization (**Fig 4B, S3C-D**), while bolus immunized animals made anti-His IgG  
239 responses after the booster immunization. A fraction of the Env-specific B and GC B cells likely  
240 recognized the His epitope. The 2<sup>nd</sup> Olio6-CD4ko Env trimer immunization induced anamnestic Env IgG  
241 responses in both the conventional bolus immunized animals and the slow release minipump  
242 immunized animals, with minipump outperforming conventional bolus immunization (**Fig 4A**). BG505  
243 Env-specific IgG titers increased in response to the 2<sup>nd</sup> minipump immunization prior to the end-of-  
244 regimen bolus injection, demonstrating that slow delivery immunization alone was sufficient for  
245 substantial anamnestic plasma cell development (w7 vs w10, p = 0.008). Env-binding IgG titers between  
246 conventional bolus groups and between osmotic minipump groups were similar to the previous study  
247 after each immunization (**Fig S3E**).

248 To assess the development of autologous tier 2 nAb titers over time, sera were tested for  
249 neutralization of BG505 N332 pseudovirus using TZM-bl neutralization assays (**Fig 4C-D, S3F-H**). By  
250 w10, 5/8 osmotic minipump immunized animals developed nAbs in contrast to 0/3 bolus animals (1:99  
251 vs < 1:10 geometric mean titer [GMT]). All minipump immunized animals developed nAbs by w18 (**Fig**



252 **4C**). Peak BG505 neutralization titers of minipump animals were ~20-fold higher than bolus animals  
253 (1:202 vs 1:10 GMT,  $p = 0.01$ ). 6/8 minipump immunized animals demonstrated partial neutralization  
254 breadth, neutralizing one to three heterologous HIV-1 isolates (**Fig 4E, S3J**). No heterologous tier 2  
255 nAbs were detected in animals that received a conventional immunization regimen. In sum, slow release  
256 immunization enhanced the magnitude and quality of the Ab response to Env immunization, which was  
257 associated with the enhanced Env-specific GC B cell and GC Tfh cell responses.

258

### 259 **Slow delivery immunization alters the antigen-specific B cell repertoire**

260 Because of the higher frequencies of high-affinity B cells and nAb titers observed in the  
261 minipump immunized animals, we hypothesized that slow release immunization delivery may affect  
262 several aspects of B cell responses. Firstly, slow antigen delivery may activate (direct effect) or recruit  
263 (via T cell help) more diverse B cell lineages. Inclusion of more independent clonal lineages of B cells  
264 would increase the likelihood that B cells with rarer and/or lower-affinity BCRs capable of developing  
265 into nAbs will be expanded. Secondly, slow delivery immunization may result in the generation of higher  
266 numbers of memory B cells capable of re-circulating and reseeding new GCs among multiple LNs upon  
267 booster immunization. Finally, slow release immunization may drive higher frequencies of SHM. A major  
268 technical challenge for testing these hypotheses in NHPs was the lack of a complete genomic sequence  
269 of the RM immunoglobulin (Ig) gene loci. A complete germline Ig gene reference is required for proper  
270 B cell lineage assignment and identification of authentic SHM. While a RM genome sequence was  
271 available (Gibbs et al., 2007), the Ig genes were largely unmapped because Ig genes reside within highly  
272 complex genomic regions that are characterized by high levels of repetitive sequence architecture and  
273 inter-individual haplotype variation (Watson et al., 2017). Genomic characterization and annotation of  
274 Ig genes has proven challenging because of this complexity (Watson and Breden, 2012). Most next  
275 generation sequencing techniques use short read technologies (~150bp), which can be insufficient for  
276 resolving large (>15kb) repetitive segmental duplications (Alkan et al., 2011). Therefore, we sequenced  
277 the genome of a RM using Pacific Biosciences (PacBio) long-read sequencing technology to 60-fold  
278 coverage. Overall, reads obtained had a median length of 16.6kb and a maximum length of 69.4kb.  
279 Genome assembly was conducted using FALCON/FALCON-Unzip (Chin et al., 2016), resulting in a total  
280 of 1,633 primary contigs with a median length of 8.4mb (2.83gb total bases).

281 Contigs containing the IGH, IGL and IGK loci were identified, and V, D and J genes were  
282 annotated via a combination of bioinformatics and manual curation (**Fig 5A**). 66 IGHV, 41 IGHD, 6 IGHI,

283 68 IGKV, 5 IGKJ, 65 IGLV, and 7 IGLJ genes were identified by focusing on gene segment annotations  
284 with open reading frames (ORFs; **Fig 5A**). Notably, the long reads generated from this experiment  
285 allowed for the characterization of regions that were unresolved in previous assemblies, including the  
286 current RM reference genome (rheMac8), facilitating descriptions of novel gene loci (**Fig 5B**). On top of  
287 identification of novel gene loci, it was possible to identify heterozygous allelic variants at loci identified  
288 in primary contigs by using a combination of raw PacBio read data and alternate contigs from FALCON-  
289 Unzip, facilitated by the long reads (**Fig 5C-E**). Together, we determined that 37/66 IGHV, 31/68 IGKV,  
290 and 12/65 IGLV genes were heterozygous, amounting to a germline database of 103, 99, and 77 V  
291 alleles for each respective locus (**Fig 5E, Table S3**). Sequencing BCR RNA of mature B cells from the  
292 same animal and close relatives supported the presence of these annotated ORF sequences (data not  
293 shown). A significant fraction of alleles identified in the PacBio assemblies were not represented by  
294 sequences in either the IMGT database or NCBI repositories, highlighting the utility of this approach for  
295 improving upon existing genomic databases (**Fig 5F**). In contrast to previous work suggesting  
296 differences in Ig gene sub-family composition between human and RM (Vigdorovich et al., 2016), we  
297 found gene family sizes to be comparable between the two species (**Fig 5G**).

298 To assess how slow delivery immunization affected the repertoire of the Env-specific B cell  
299 response, we isolated and sequenced BCRs from Env-specific B cells in the draining LNs of animals  
300 immunized with conventional or slow release modalities (**Fig S4A**). The majority of the sequenced Env-  
301 specific B cells were GC B cells (77%), providing a window into this difficult-to-study cell type. Utilizing  
302 the new RM Ig reference sequence, we assigned each unique BCR sequence to the V and J genes with  
303 most similarity, performed lineage analysis, and determined SHMs. More Env-specific B cells were  
304 isolated from minipump immunized animals compared to bolus animals (303,644 vs. 52,302 cells [total];  
305 20,242 vs. 8,717 cells [mean],  $p = 0.029$ ) (**Table S1**), consistent with the higher frequencies of Env-  
306 specific B cells identified by flow cytometry (**Fig 1, 3**). Much greater numbers of unique Env-specific BCR  
307 sequences were isolated from slow delivery immunized animals than bolus animals, both for heavy chain  
308 (52,772 vs 9,604 *IgG*) and light chains (40,255 vs 8,642 *IgL*; 39,131 vs 6,358 *IgK*). Furthermore,  
309 significantly more unique *IgG* and *IgK* B cell lineages were identified in LNs of minipump immunized  
310 animals compared to conventional bolus immunized animals (**Fig 5H, S4B**). While most BCR lineages  
311 were found in only one LN (**Fig S5C**), 0.7 - 30.2% were found in both R and L LNs (**Fig 5I-J**). SHM rates  
312 in minipump and bolus BCR lineages were largely similar (**Fig 5K, S4D-E**). Thus, substantially more Env-  
313 specific GC B cell lineages were sustained in animals receiving a slow release immunization, while SHM

314 rates were comparable.

315

### 316 **Slow delivery immunization resulted in greater diversity of antibodies and recognized epitopes**

317         Given that slow release immunization resulted in more Env-specific B cell lineage diversity, we  
318 sought to determine if differential IgV gene usage occurred, which may suggest differences in the  
319 epitopes targeted on the Env trimer. Strikingly, bolus animals utilized IGLV3.15 and IGHV3.76  
320 significantly more frequently than pump animals ( $q = 0.00003$  and  $q = 0.03$ , respectively) (**Fig 6A-B**).  
321 21.9% and 13.5% of Env-specific B cells from LNs of bolus animals utilized IGLV3.15 and IGHV3.76,  
322 respectively. 3.3% and 4.1% of Env-specific B cells from LNs from minipump animals utilized IGLV3.15  
323 and IGHV3.76, respectively. Using IMGT for similar analysis, a difference in IGLV3.15 (aka IGLV3-10) was  
324 identified between groups (**Fig S4F**). No difference in IGHV gene use was identified due to the low  
325 number of V genes available in IMGT. Analyzing the data with a broader Ig database incorporating both  
326 genomic and RNA sequencing data (Corcoran et al., 2016; Ramesh et al., 2017; Sundling et al., 2012),  
327 use of IGLV3.15 (aka IGLV3-5) was again significantly higher among bolus immunized animals ( $q =$   
328  $0.0003$ ) (**Fig S4G**). Env-specific B cells that used IGLV3.15 were phylogenetically diverse and could be  
329 found in both draining LNs within a single animal (**Fig 6C, S5A**).

330         The differential use of IGLV3.15 suggested that the Env-specific B cells elicited by bolus  
331 immunization targeted epitopes distinct from the Env-specific B cells elicited by slow release  
332 immunization. Taken together with the lack of HIV-1 nAbs in the conventional bolus immunized animals,  
333 we hypothesized that B cells that utilized IGLV3.15 recognized the base of the trimer. This region is  
334 normally hidden on full length Env expressed on virions. In contrast, the base is the largest  
335 proteinaceous region exposed on soluble Env trimer due to the unusually dense glycans covering most  
336 of the remainder of the surface of HIV-1 Env (Stewart-Jones et al., 2016)(**Fig 6D**) . The base is a major  
337 non-neutralizing Ab target in mice and macaques immunized with soluble Env trimer, and base-specific  
338 B cells are proposed to be immunodominant to nAb-epitope-specific B cells (Havenar-Daughton et al.,  
339 2017; Hu et al., 2015; Kulp et al., 2017). To test this hypothesis, we sequenced 196 Env-specific single B  
340 cells from the draining LNs of two bolus immunized animals at w7 to obtain paired BCR sequences  
341 utilizing IGLV3.15. We selected an IGLV3.15 utilizing clone and synthesized the corresponding  
342 monoclonal Ab (mAb), termed BDA1. The IGLV3.15 utilizing mAb BDA1 bound BG505 Env trimer, but  
343 not monomeric BG505 gp120 or His peptide. (**Figure 6E-F, S5B**). BDA1 binding to Env trimer was  
344 selectively blocked by 19R, a high affinity Env base-binding mAb, demonstrating that BDA1 recognizes

345 the Env trimer base (**Figure 6G**). EM analysis of a BDA1 Fab complex with BG505 Env trimer confirmed  
346 binding of BDA1 to the trimer base (**Figure 6H**). We next sought to determine how BDA1 (w7) was  
347 related to the Env-specific B cells isolated from the same LN after booster immunization with Env trimer  
348 (w12). Alignment and phylogenetic analysis of the BDA1 lineage consisted of BDA1, three related w12  
349 sequences, and the inferred germline sequence, with few mutations between the BDA1 heavy chain and  
350 the related w12 IgG GC B cell sequences (**Fig S5C-D**). The BDA1 IGLV3.15 light chain displayed more  
351 diversity between w7 and w12, indicating recall GC responses of IGV3.15<sup>+</sup> cells and ongoing SHM (**Fig**  
352 **S5E-F**).

353 We utilized polyclonal EM serological analysis as an independent approach to assess the Ab  
354 responses to Env trimer between the two immunization strategies (Bianchi et al., 2018). This new  
355 technique allows for simultaneous visualization of diverse Abs targeting distinct epitopes, directly from  
356 polyclonal serum processed into Fabs. Ab responses in conventional bolus immunized animals targeted  
357 two sites on Env: the trimer base (3/3 animals), and the N335 region (3/3 animals). (**Fig 6I, S6**). In  
358 contrast, the polyclonal Ab responses in minipump immunized animals were substantially more diverse.  
359 In addition to the base and N335 regions, three potential nAb epitopes, the fusion peptide, V1/V3, and  
360 C3/V5 regions (Klasse et al., 2018; Kong et al., 2016) were targeted by pump immunized animals (**Fig**  
361 **6I, S6**). Base directed Ab responses were present in minipump immunized animals, as expected. In sum,  
362 BCR sequencing, mAb characterization, and polyclonal EM analyses demonstrated that slow release  
363 immunization resulted in a substantial shift in the GC B cell and Ab response towards Env epitopes that  
364 are both distinct from, and more diverse than, the Env epitopes predominantly targeted in response to  
365 conventional bolus immunization. Notably, the shifted response is towards nAb epitopes, which are  
366 likely immunorecessive epitopes in comparison to the epitopes of the Env trimer base, indicating that  
367 slow release immunization causes a substantial modulation of immunodominance or change in the  
368 immunodominance hierarchy. Together with the Env-specific GC B cell kinetics and the enhanced Env-  
369 specific GC Tfh cell responses, these data provide a logical and plausible immunological explanation  
370 for the dramatic difference in HIV-1 nAb titers between the groups.

371

### 372 **Escalating dose immunization enhances germinal center and nAb responses**

373 Dose escalation is an immunization strategy to achieve extended antigen exposure that is an  
374 approach distinct from osmotic minipumps (Tam et al., 2016). Escalating dose (ED) immunization has  
375 the added advantage of mimicking the antigen dose kinetics of an acute infection. Therefore, an NHP

376 ED study was performed with Env trimer as an independent assessment of the immunological  
377 implications of extended (two week) antigen delivery in a vaccine setting. The control group was given  
378 conventional bolus immunizations at w0, w10, and w24, totaling 100 $\mu$ g, 100 $\mu$ g, and 300 $\mu$ g of Olio6  
379 native-like Env trimer protein, respectively, mixed with an ISCOMs-class adjuvant, as per the osmotic  
380 minipump study (**Fig 7A**). ED immunizations were administered as 7 injections over 2 weeks (**Fig 7A**),  
381 with a total antigen dose equivalent to that of the conventional bolus immunization group. Significantly  
382 higher frequencies of GC B cells in draining LNs were observed at w5 in the ED group compared to the  
383 conventional bolus immunization group (**Fig 7B-C, S7A**). ED immunization resulted in significantly more  
384 Env-specific B and GC B cell after the 1<sup>st</sup> immunization ( $p = 0.0002$  [AUC]) (**Fig 7D-E, S7B-F, Table S4**).  
385 ED immunization also elicited improved affinity maturation, as indicated by the enhanced development  
386 of Env<sup>hi</sup> GC B cells compared to conventional immunization after the 1<sup>st</sup> immunization (**Fig S7G-J, Table**  
387 **S5**). Additionally, ED immunization resulted in significantly more Env-specific memory B cells compared  
388 to conventional immunization after the 1<sup>st</sup> immunization (**Fig S7K-N**). Total GC B cell frequencies, and  
389 Env-specific GC and memory B cell frequencies also increased upon the 2<sup>nd</sup> and 3<sup>rd</sup> ED immunizations,  
390 though not above the peak frequencies observed in response to the 1<sup>st</sup> ED regimen (**Fig 7B-E, S7A-N**).  
391 Analysis of CD4<sup>+</sup> T cells in the draining LNs by LN FNA revealed that ED resulted in significantly higher  
392 total GC Tfh and Env-specific GC Tfh after the 1<sup>st</sup> immunization (**Fig 7F-H, S7O-P**). ED immunized  
393 animals showed a higher ratio of Env<sup>+</sup> GC B cells: Env-specific GC Tfh cells, suggesting that ED  
394 immunization results in greater antigen-specific help to B cells than conventional immunization (**Fig 7I**).  
395 The magnitude of the improved primary Env-specific GC B cell response, the increased GC Tfh cell  
396 response, and the enhanced Env<sup>hi</sup> GC B cell response upon ED immunization were comparable to those  
397 observed after minipump immunization.

398 A single ED immunization regimen was sufficient to elicit a BG505 Env-specific IgG response  
399 (**Fig 7J**). Anamnestic Env-binding plasma Ab responses were observed after the 2<sup>nd</sup> and 3<sup>rd</sup> DE and  
400 conventional immunizations (**Fig 7J**). All ED immunized animals developed tier 2 BG505 HIV-1 nAbs  
401 after the 2<sup>nd</sup> immunization, while only 3/6 conventionally immunized animals developed nAbs (**Fig 7K**).  
402 Peak tier 2 nAb titers after the 3<sup>rd</sup> immunization were ~30-fold higher in ED immunized RMs, significantly  
403 greater than conventionally immunized RMs (1:615 vs 1:18 GMT,  $p = 0.009$ ) (**Fig 7L**; nAb breadth in **Fig**  
404 **S7Q**).

405 Total GC Tfh frequencies correlated with total GC B frequencies during the 1<sup>st</sup> immunization ( $r$   
406 = 0.773,  $p = <0.0001$  [peak of 1<sup>st</sup> immunization], **Fig 7M**). In a previous study, total GC B frequencies

407 correlated with nAb development (Pauthner et al., 2017). A primary hypothesis of this study was that the  
408 magnitude of Env-specific GC B cell responses to the 1<sup>st</sup> immunization might predict nAb development.  
409 Peak Env<sup>+</sup> GC B frequencies to the 1<sup>st</sup> immunization correlated with peak nAb titers in response to the  
410 2<sup>nd</sup> immunization ( $r = 0.673$ ,  $p = 0.0008$  [w7];  $r = 0.596$ ,  $p = 0.0027$  [peak of 1<sup>st</sup> immunization]. **Fig 7N**),  
411 indicating that Env<sup>+</sup> GC B cell frequencies and Env-specific GC Tfh cell responses can predict  
412 subsequent nAb development.

413 Taken together, the data show that the ED immunization modality generated greater GC and  
414 humoral responses than dose-matched conventional immunization, closely recapitulating the immune  
415 responses elicited to osmotic minipump immunization, indicating that modulation of GC B cell and Tfh  
416 cell responses is a general property of slow delivery immunization strategies, which can result in  
417 dramatically different B cell specificities and nAb development.

418 An ED regimen resulted in enhanced FDC deposition of antigen in mice (Tam et al., 2016). We  
419 hypothesized that the enhanced GC responses observed here in Env trimer immunized RMs with both  
420 slow delivery immunization modalities were, at least in part, due to increased availability of antigen to  
421 GC B cells and GC Tfh cells (Cirelli and Crotty, 2017). Therefore, an antigen tracking study was  
422 performed in RMs with labeled Env trimer and ISCOMs-class adjuvant administered via a conventional  
423 bolus ( $n = 3$ ), 2w osmotic pump ( $n=3$ ) or an escalating dose regimen ( $n=3$ ). Histological analyses of  
424 draining LNs revealed extensive Env localized within follicles after pump or ED immunization, while none  
425 was detectable in those of bolus immunized animals (**Fig 7O**). Thus, slow delivery immunization leads  
426 to enhanced antigen retention within LNs in NHPs.

427

## 428 **DISCUSSION**

429 Understanding the underlying immunological challenges to nAb development against  
430 challenging pathogens may be important for understanding why protective immunity to such pathogens  
431 is elusive; direct examination of primary immune responses in lymphoid tissue is required to develop  
432 such an understanding. Strategies to enhance the humoral and GC responses to immunization are also  
433 likely needed for the development of vaccines against some complex pathogens, particularly HIV-1.  
434 Using two independent methods, we have demonstrated that slow delivery immunization resulted in  
435 enhanced Tier 2 nAb development in NHPs. To examine the immune responses directly in the draining  
436 LNs, we employed weekly LN FNAs. From this, we were able to ascertain that conventional bolus  
437 immunization elicited a robust GC response, but that slow delivery immunization altered the kinetics and

438 overall magnitude of the GC response. Strikingly, slow antigen delivery modulated the  
439 immunodominance of the B cell response to non-neutralizing epitopes on Env trimer. Each of these  
440 differences were prominent during the primary immune response and were positively associated with  
441 the larger nAb response that subsequently developed in slow delivery immunized animals, suggesting  
442 that much of the failure of a bolus immunization to a difficult antigen is intrinsic to early B cell events  
443 associated with immunodominance features of multi-epitope complex antigens.

444 Detailed weekly analysis of the primary immune response to Env trimer in draining LNs of RMs  
445 immunized by conventional bolus injection revealed more durable GC responses than expected, with  
446 relatively stable Env-specific GC B cell frequencies from 4-8 weeks postimmunization. Perhaps the most  
447 dramatic observation in the bolus immunized animals was the degree of immunodominance observed  
448 in the GC B cell response to Env trimer. Approximately 25% of Env trimer-specific B cells in bolus  
449 immunized animals were IGLV3.15<sup>+</sup>. An antibody utilizing IGLV3.15, BDA1, targeted the non-  
450 neutralizing base of the Env trimer. The base is a major site recognized by Abs of recombinant trimer-  
451 immunized animals (Havenar-Daughton et al., 2017). The Env trimer base appears to be  
452 immunodominant because it is a large exposed protein surface with many potential epitopes and  
453 acceptable BCR angles of approach when compared to the other surfaces of Env trimer, which are  
454 predominantly shielded by large glycans. Because BDA1 had relatively modest affinity for Env trimer,  
455 and many IGLV3.15<sup>+</sup> GC B cell lineages were observed, we speculate that the IGLV3.15<sup>+</sup> base-specific  
456 B cell response is immunodominant because the precursor B cells are common rather than being of  
457 particularly high affinity. More broadly, differences in B cell responses to the same antigen between  
458 immunization strategies, the BDA1 data, Env-specific BCR sequence repertoire results, Env trimer  
459 binding Ab titers, nAb titers, and the polyclonal Ab EM mapping together demonstrate substantial  
460 immunodominance of non-neutralizing B cells that outcompete B cells specific for neutralizing epitopes  
461 after a conventional bolus injection.

462 The most unexpected outcome was that slow antigen delivery altered the repertoire of the  
463 responding Env-specific B cells and the range of Ab specificities and nAb specificities. The simplest  
464 explanation for this outcome was that slow antigen delivery increases the likelihood that rare and/or  
465 lower affinity immunorecessive nAb precursors are recruited into the B cell response, resulting in more  
466 diversity in the epitopes targeted among the GC B cells. We reiterate that the antigen dose was equal  
467 between the bolus and pump immunized animals, and between the bolus and ED animals, thus total  
468 antigen dose is not the driver of these differential outcomes. A small fraction of Env-specific B cells from

469 minipump immunized animals utilized IGLV3.15, but Abs isolated from pump animals still targeted the  
470 base, consistent with diverse epitopes accessible on the base allowing BCRs targeting this site utilizing  
471 diverse *IGHV* and *IGLV* genes.

472 While the trimer base was exposed in both contexts, differences in epitope accessibility on the  
473 Env trimer may exist between immunization strategies. Immune complexes (ICs), composed of Env  
474 trimer and antibodies, are bound by FDCs for presentation to B cells. Binding of an antibody to its  
475 cognate epitope, however, can block further access to that epitope by B cells undergoing selection. We  
476 speculate that a large fraction of the early antibody response targets the base, later reducing the  
477 response against this region. During a slow delivery immunization, early base-specific nAbs may form  
478 ICs with newly available Env trimers, enhancing presentation on FDCs and possibly increasing the  
479 likelihood that nAb epitope-specific GC B cells will be selected for survival both due to increased antigen  
480 availability in the GC and the orientation of the Env trimer occluding the base (**Fig 7P**).

481 We had predicted that slow release immunization would reduce the B cell response to protein  
482 breakdown products and fragments that occur in vivo, such as the internal face of gp120 and V3, by  
483 protecting the antigen in its native form, thus having a greater percentage of intact Env trimer antigen  
484 on FDCs at 2-10 weeks postimmunization (**Fig 7P**) (Cirelli and Crotty, 2017; Tam et al., 2016). However,  
485 differential responses to intact Env trimer were not predicted. GC B cell responses to gp120 internal  
486 face and breakdown products are surely present in each of these groups of animals. These cells likely  
487 make up a substantial fraction of the 'dark antigen' GC response (Kuraoka et al., 2016), and may have  
488 immunodominant specificities, as a majority of GC B cells did not bind intact native Env trimer with  
489 measurable affinity (**Fig 1I, S7G**). Adjuvant alone does not induce a GC B cell response (Havenar-  
490 Daughton et al., 2016a), consistent with the conclusion that the GC B cells elicited in these immunizations  
491 are predominantly specific for Env. While those specificities are of some interest, in this study we focused  
492 on the Env trimer-binding B cells, due to the limited cell numbers in each sample.

493 As noted above, the simplest explanation for altered immunodominance was increased  
494 recruitment of rare or lower affinity immunorecessive nAb precursors into the B cell response. It has  
495 been reported that naive antigen-specific B cells normally have a narrow window of time of a few days  
496 to be recruited into a GC response (Turner et al., 2017). A narrow window of time for B cell recruitment  
497 disproportionately affects B cells with rare precursor frequencies. Slow antigen delivery may  
498 substantially expand the pool of recruited B cells by extending that window, thereby increasing the  
499 breadth of the B cell repertoire sampled by the draining LN. Additionally, Tfh selection of B cells based



500 on affinity (peptide-MHCII complex presentation) may be most stringent prior to the GC response  
501 (Schwickert et al., 2011; Yeh et al., 2018); slow antigen delivery may reduce that stringency by  
502 substantially broadening the time window for Tfh interactions with Env-specific B cells of differing  
503 epitope specificities at the border of the follicle. The diversity of the B cell response would then likely be  
504 greater at the end of the immunization, if the diversity was maintained.

505 The data are also consistent with multiple mechanisms of action potentially altering the nAb  
506 outcomes. Several aspects of GC biology were affected by slow delivery. Slow delivery immunization  
507 induced higher frequencies and numbers of total and Env-specific GC Tfh cells. Slow delivery regimens  
508 resulted in greater retention of antigen within LNs. Greater availability of GC Tfh cell help and antigen  
509 to B cells was accompanied by larger and more enduring GC B responses. Slow delivery resulted in a  
510 substantially higher number of Env-specific GC B cells. The GC B cells were also more diverse, as defined  
511 by unique Env-specific B cell lineages, which may be a consequence of broader initial activation of  
512 antigen-specific B cells described above, or a consequence of sustaining larger GCs over time, or both.  
513 The biological relevance of those processes is reinforced by the observation of more diverse nAb Env-  
514 binding specificities generated in slow delivery immunized animals contrasted with conventional bolus  
515 immunization, as defined by polyclonal Ab EM mapping.

516 NAb and germinal center responses to secondary immunizations in conventional bolus  
517 immunized animals were weaker in this study than a previous study (Pauthner et al., 2017); this may be  
518 due to a change in adjuvant formulation. Nevertheless, nAbs were robust in response to minipump or  
519 ED immunization.

520 Despite a considerable apparent difference in affinity maturation (Env<sup>hi</sup> GC B cells and Env<sup>hi</sup>  
521 memory B cells), SHM rates were largely equivalent between groups after two immunizations. The data  
522 suggest that differential rates of SHM were not the cause of the improved affinity maturation and  
523 improved nAb responses. A study examining SHM in memory B cells after RM immunizations with  
524 nonnative Env trimers and a range of adjuvants (which did not elicit tier 2 nAbs) did not observe  
525 differences in SHM between groups (Francica et al., 2015). The SHM data are again consistent with a  
526 model where the primary cause of the difference in the neutralizing Ab outcomes was the altered  
527 immunodominance profile of the B cell response.

528 While slow delivery immunization can alter the immunodominance of epitopes and enhance the  
529 response to immunization, immunogens should be also be optimized to minimize responses against  
530 non-neutralizing epitopes. These results are consistent with immunodominance findings in HIV-1 bnAb

531 mouse models (Abbott et al., 2018; Duan et al., 2018). Osmotic pumps have been used in humans for  
532 drug delivery and are feasible for early human vaccine trials. However, it is impractical for large-scale  
533 vaccination efforts, as it requires a simple surgery. Nevertheless, ED is technically available immediately  
534 as a GC enhancing alternative to conventional bolus immunization. Less cumbersome slow delivery  
535 immunization technologies are worthy of further development, including degradable encapsulating  
536 biomaterials and depot forming adjuvants that make antigen available over time (i.e., not rendered inert  
537 in the depot) in ways that sustain GCs (DeMuth et al., 2013; 2014). Such technologies may be able to  
538 rescue protective immune responses to antigens that have previously failed by conventional bolus  
539 immunization, if immunodominance of non-neutralizing epitopes was a factor in their failure.  
540

541 **AUTHOR CONTRIBUTIONS**

542 K.M.C. performed AIM assays, ELISAs and BCR expression assays and analyzed flow cytometry, ELISA  
543 and BCR sequence data. D.G.C., C.A.E., E.H.G., Y.C., and F.V. performed NHP experiments and Env-  
544 specific B cell stains. A.A.U., V.K., and B.M. performed and analyzed BCR sequence and lineage analyses.  
545 C.N. and M.B.M. performed ELISAs. M.P. and R.B. performed and analyzed neutralization assays. A.N.W.  
546 performed single cell RNA-seq. C.A.C., B.N., and A.B.W. performed and analyzed EM experiments. S.R.  
547 performed CD38-CD71 GC B validation experiments. J.T.M. performed histology for antigen tracking  
548 study. S.C. designed the genome sequencing study. W.G., O.L.R. and C.T.W. annotated the germline Ig  
549 loci. N.P. and S.E.B. provided tissue for genomic sequencing. T.T. and D.J.I. provided the ISCOMs-type  
550 adjuvant. S.M., D.W.K., W.R.S. provided immunogens and Env probes. K.M.C. and S.C. prepared the  
551 manuscript, with input from other authors. D.J.I. and S.C. conceived of the study. S.C. and G.S.  
552 supervised the study.

553

554 **DECLARATION OF INTERESTS**

555 The authors declare no competing interests.

556

557 **ACKNOWLEDGEMENTS**

558 We thank Chai Fungtammasan and Brett Hannigan of DNAnexus for assembly of the rhesus macaque  
559 genome and helpful discussions, and Sanjeev Gumber of Yerkes National Primate Research Center for  
560 assistance with tissue isolation for genomic sequencing. This work was funded by NIH NIAID grant R01  
561 AI125068 (D.J.I. and S.C.), NIH NIAID 1UM1AI100663 to the Scripps CHAVI-ID (SC, GS, DJI, WS, ABW,  
562 DRB), National Primate Research Center funding (P51 RR000165/OD011132 to the Yerkes National  
563 Primate Research Center) and NIH NIAID UM1AI124436 to the Emory Consortium for Innovative AIDS  
564 Research. C.A.C. is supported by NIH F31 Ruth L. Kirschstein Predoctoral Award AI131873 and by the  
565 Achievement Rewards for College Scientists Foundation.

566

567

568

569

570

571

572 **STAR Methods**

573 **CONTACT FOR REAGENT AND RESOURCE SHARING**

574 Further information and requests for resources and reagents should be directed to and will be fulfilled  
575 by the Lead Contact, Shane Crotty ([shane@lji.org](mailto:shane@lji.org)).

576

577 **EXPERIMENTAL MODEL AND SUBJECT DETAILS**

578 **Rhesus Macaques**

579 Outbred Indian RMs (*Macaca mulatta*) were sourced and housed at the Yerkes National Primate  
580 Research Center and maintained in accordance with NIH guidelines. This study was approved by the  
581 Emory University Institutional Animal Care and Use Committee (IACUC). When osmotic pumps were  
582 implanted, animals were kept in single, protected contact housing. At all other times, animals were kept  
583 in paired housing. Animals were treated with anesthesia and analgesics for procedures as per  
584 veterinarian recommendations and IACUC approved protocols. In all studies, animals were grouped to  
585 divide age, weight and gender as evenly as possible.

586 Osmotic pump study: Animals were between 2.5 - 3 years of age at time of 1<sup>st</sup> immunization.  
587 Bolus group 2: 2 males (M), 1 female (F); 2w pump group: 3M, 1F; 4w pump group: 3M, 1F.

588 Dose escalation study: Animals were between 3 - 6.5 years of age at time of 1<sup>st</sup> immunization.  
589 Bolus group 1: 3M, 3F; escalating dose group: 2M, 4F.

590 Antigen tracking study: animals were between 3 - 6 years of age at time of immunization. Bolus  
591 group: 2M, 1F; pump group: 3M; escalating dose group: 3M.

592

593 **METHOD DETAILS**

594 **Immunizations**

595 Osmotic pump study: Animals were immunized at 2 time points: week 0 and week 8. All immunizations  
596 were administered subcutaneously (SubQ) divided between the left and right mid-thighs. Bolus animals  
597 were given two SubQ injections of 50µg of Olio6-CD4ko + 187.5 units (U) of saponin adjuvant in PBS,  
598 for a total of 100µg Olio6-CD4ko trimer protein + 375U of saponin adjuvant. At week 0, osmotic pumps  
599 (Alzet, models -2002 and -2004) were loaded with 50µg Olio6-CD4ko + 187.5U saponin adjuvant, for a  
600 total of 100µg Olio6-CD4ko trimer + 375U of saponin adjuvant. Pumps were implanted SubQ in the  
601 same location as bolus immunizations. At week 8, osmotic pump animals were immunized with osmotic  
602 pumps loaded each with 25µg Olio6-CD4ko + 93.75U saponin adjuvant. At the end of the osmotic pump

603 delivery, a SubQ bolus immunization of 25µg Olio5-CD4ko + 93.75U was given in each leg, totaling  
604 50µg Olio6-CD4ko + 187.5U saponin adjuvant at weeks 12 and 14 for 2 week and 4 week osmotic pump  
605 groups, respectively.

606

607 Dose escalation study: Animals were immunized at 3 time points: weeks 0, 10, and 24. All immunizations  
608 were administered SubQ in the left and right mid-thighs. Bolus animals were given two injections of  
609 50µg of Olio6 + 187.5U of saponin adjuvant in PBS, for total of 100µg immunogen and 375U saponin  
610 adjuvant at weeks 0 and 8. At week 24, two injections of 150µg of Olio6 + 187.5U saponin adjuvant were  
611 administered for a total of 300µg Olio6 + 375U saponin adjuvant. For each immunization, escalating  
612 dose animals were given seven injections of Olio6 and saponin adjuvant in each thigh over 12 days (on  
613 days 0, 2, 4, 6, 8, 10, 12 for each immunization). The total doses of Olio6 at each injection during the first  
614 two immunizations were: 0.2, 0.43, 1.16, 3.15, 8.56, 23.3, 63.2µg (the doses per immunization site were  
615 0.1, 0.215, 0.58, 1.575, 4.28, 11.65, 31.6µg). The total doses of Olio6 at each injection during the third  
616 immunization were: 0.6, 1.29, 3.48, 9.45, 25.68, 69.9, 189.6µg (the doses per immunization site were  
617 0.3, 0.645, 1.74, 4.725, 12.84, 34.95, 94.8µg). The total doses of saponin adjuvant at each injection  
618 during all immunizations were: 0.75, 1.61, 4.35, 11.81, 32.1, 87.38, 237.0U (the doses per immunization  
619 site were 0.375, 0.805, 2.175, 5.905, 16.05, 43.69, 118.5U).

620

621 Antigen tracking study: Animals were immunized at week 0 with a total dose of 100ug untagged MD39  
622 conjugated to Alexa Fluor 647. All immunizations were administered SubQ in the left and right mid-  
623 thighs. Bolus animals were given 2 injections of 50µg MD39 + 187.5U of saponin adjuvant in PBS.  
624 Osmotic pumps (Alzet, models 2002) were loaded with 50µg MD39 + 187.5U saponin adjuvant.  
625 Escalating dose animals were given a series of 7 injections over 12 days (on days 0, 2, 4, 6, 8, 10, 12 for  
626 each immunization). The total dose of MD39 at each injection were: 0.2, 0.43, 1.16, 3.15, 8.56, 23.3,  
627 63.2µg (the doses per immunization site were 0.1, 0.215, 0.58, 1.575, 4.28, 11.65, 31.6µg). The total  
628 doses of saponin adjuvant at each injection were: 0.75, 1.61, 4.35, 11.81, 32.1, 87.38, 237.0U (the doses  
629 per immunization site were 0.375, 0.805, 2.175, 5.905, 16.05, 43.69, 118.5U). Animals were sacrificed  
630 at 2 days after immunization (bolus, d2; pumps, d16; escalating dose, d14). All inguinal LNs were  
631 harvested and fixed in PLP buffer (pH7.4 50mM PBS + 100mM lysine, 1% paraformaldehyde, 2mg/mL  
632 sodium periodate) for 1 week at 4°C and then washed and stored in PBS with 0.05% sodium azide at  
633 4°C until used for imaging.

634 **Lymph node fine needle aspirates, whole LN biopsy tissue, blood collection and processing**

635 LN FNAs were used to sample at both right and left inguinal LNs. FNAs were performed by a veterinarian.  
636 Draining lymph nodes were identified by palpitation. Cells were collected by passing a 22-gauge needle  
637 attached to a 3mL syringe into the lymph node 4 times. Samples were expelled into RPMI containing  
638 10% fetal bovine serum, 1X penicillin/streptomycin. Samples were centrifuged and Ammonium-  
639 Chloride-Potassium (ACK) lysing buffer was used if sample was contaminated with red blood cells.  
640 Excisional LNs were conducted at weeks 12 (bolus) or 14 (osmotic pump groups). LNs were dissociated  
641 through 70 $\mu$ M strainers and washed with PBS. Blood was collected at various time points into CPT tubes  
642 for PBMC and plasma isolation. Serum was isolated using serum collection tubes and frozen.

643

644 **ISCOMs-class saponin adjuvant**

645 The adjuvant used for all the described studies was a ISCOM-like saponin nanoparticle comprised of  
646 self-assembled cholesterol phospholipid, and Quillaja saponin prepared as previously described  
647 (Lövgren-Bengtsson and Morein, 2000). Briefly, 10 mg each of cholesterol (Avanti Polar Lipids) and  
648 DPPC (Avanti Polar Lipids) were dissolved separately in 20% MEGA-10 (Sigma-Aldrich) detergent at a  
649 final concentration of 20 mg/mL and 50 mg Quil-A saponin (InvivoGen) was dissolved in MilliQ H<sub>2</sub>O at a  
650 final concentration of 100 mg/mL. Next, DPPC solution was added to cholesterol followed by addition  
651 of Quil-A saponin in rapid succession and the volume was brought up with PBS for a final concentration  
652 of 1 mg/mL cholesterol and 2% MEGA-10. The solution was allowed to equilibrate at 25°C overnight,  
653 followed by 5 days of dialysis against PBS using a 10k MWCO membrane. The adjuvant solution was  
654 filter sterilized using a 0.2  $\mu$ m Supor syringe filter, concentrated using 50k MWCO centricon filters, and  
655 further purified by FPLC using a Sephacryl S-500 HR size exclusion column. Each adjuvant batch was  
656 finally characterized by negative stain transmission electron microscopy (TEM) and dynamic light  
657 scattering (DLS) to confirm uniform morphology and size and validated for low endotoxin content by  
658 Limulus Amebocyte Lysate assay (Lonza). Final adjuvant concentration was determined by cholesterol  
659 quantification (Sigma-Aldrich).

660

661 **Immunogen and probe generation**

662 Olio6, Olio6-CD4ko, and MD39 were generated as previously described(Kulp et al., 2017). Avi-  
663 tagged Olio6, Olio6-CD4ko, and MD39 DNA constructs were synthesized, protein was produced and  
664 purified, and the proteins were then biotinylated using BirA-500 (Avidity) and assessed for biotin

665 conjugation efficiency using SDS-PAGE. All Env immunogens and probes contained a six histidine tag  
666 (His tag) for purification. Immunogens were tested for endotoxin contamination with Endosafe PTS  
667 (Charles River). Proteins with an endotoxin level <10 EU/mg were used in immunizations. Immunogens  
668 and probes were aliquoted and kept frozen at -80°C until immediately before use.

669

## 670 **Flow cytometry and cellular analyses**

671 Biotinylated protein were individually premixed with fluorochrome-conjugated streptavidin (SA-  
672 Alexa Fluor 647 or SA-Brilliant Violet 421) at RT for 20 minutes. Olio6-CD4ko probes were used in figures  
673 1, 3, 6, and S1 (osmotic pump study) from weeks -1 to 8. Olio6 probes were used from weeks 9 to 14.  
674 Olio6 and Olio6-CD4ko differ by a single amino acid (Kulp et al., 2017). MD39 probes were used in  
675 figures 8 and S8 (dose escalation study). MD39 is closely related to Olio6.

676 For the full LN GC panel, cells were incubated with probes for 30 minutes at 4°C, washed twice  
677 and then incubated with surface antibodies for 30 minutes at 4°C. Cells were fixed and permeabilized  
678 for 30 minutes using FoxP3/Transcription Factor Staining Buffer Set (Thermo Scientific) according to  
679 manufacturer's protocols. Cells were stained with intranuclear antibodies in 1X permeabilization buffer  
680 for 30 minutes, 4°C. Cells were washed twice with 1x permeabilization buffer and acquired on an LSR I  
681 (BD Biosciences). For Ag-specific B cell sort panels, cells were incubated with probes for 30 minutes at  
682 4°C, washed twice and then incubated with surface antibodies for 30 minutes at 4°C. Cells were sorted  
683 on a FACSAria II.

684 For the osmotic pump study, full LN GC panel was used on fresh cells at weeks -2, 1-7, 9-12, 14.  
685 At weeks 7,12, and 14, cells were sorted using the Ag-specific B cell sort panel. Cells were stained fresh  
686 at week 7 and single cell sorted. At weeks 12 (bolus) and week 14 (osmotic pump animals), biopsied  
687 LNs were thawed, stained and bulk sorted for BR sequencing. Sorted cells were defined as Viability dye-  
688 CD4<sup>-</sup> CD8a<sup>-</sup> CD16<sup>-</sup> CD20<sup>+</sup> (IgM<sup>+</sup> IgG<sup>+</sup>) Olio6-Alexa647<sup>+</sup> Olio6-BV421<sup>+</sup>. For the dose escalation study,  
689 the full LN GC panel was used at every time point. Data reported are raw flow cytometry values at each  
690 time point.

691 Validation of CD38 and CD71 as surface markers of GC B cells: frozen, biopsied mesenteric LNs  
692 were used. Cells were stained as described above.

693 B cell analysis: LN FNA samples 3% of the LN on average. Because of the nature of the technique,  
694 some samples do not have enough cells to be included in the analyses. Generally, for GC and Env-  
695 specific B cell gating, a threshold of 1,000 and 10,000 B cells, respectively, is used. For Env-specific GC

696 B cell gating, a threshold of 1,000 GC B cells is used.

697 Inferred memory B cells: Memory B cells (% Env<sup>+</sup> or Env<sup>hi</sup>) were calculated as the percentage of  
698 Env-specific or high-affinity Env-specific B cells that were not Bcl6<sup>+</sup> Ki67<sup>+</sup> or CD38<sup>-</sup> CD71<sup>+</sup>. Memory Env<sup>+</sup>  
699 and Env<sup>hi</sup> (% B) cells were calculated as % Env<sup>+</sup> (% B cells) - % Env<sup>+</sup> GC B (% B) and % Env<sup>hi</sup> (% B cells) -  
700 % Env<sup>hi</sup> GC B (% B), respectively.

701 Area under the curve [AUC]: AUC was calculated for individual LNs. For figures 1 and S1, AUC  
702 was calculated from weeks 1, 3 to 7. Bolus gr1 did not have FNA data at week 1. For these samples, the  
703 median of the week 1 values from bolus gr2 was used. Raw values were used at other time points. For  
704 figure 2, AUC was calculated from weeks 1, 3 to 6. GC Tfh frequencies were not collected for bolus grp2,  
705 2w pumps or 4w pump animals at week 7. For figure 3, AUC was calculated between weeks 9 and 12  
706 because of poor cell recovery at weeks 8 and 14. For figures 8 and S8, AUC was calculated between  
707 weeks 3-7 (1<sup>st</sup> immunization) and between weeks 11-15 (2<sup>nd</sup> immunization) using raw values. Parameters  
708 used: baseline = 0; peaks less than 10% of distance from minimum to maximum y were ignored.

709

#### 710 **Antigen-specific CD4<sup>+</sup> T cell assay**

711 AIM assays were conducted as previously described (Dan et al., 2016; Havenar-Daughton et al., 2016b).

712

713 Osmotic pump study: Frozen macaque lymph nodes from week 12 (bolus animals) or week 14 (osmotic  
714 pump animals) were thawed. Cells were treated with DNase (Stemcell Technologies) for 15 minutes,  
715 37°C washed and then rested for 3 hours. Cells were cultured under the following conditions: media  
716 only (RPMI containing 10% fetal bovine serum, 1X penicillin/streptomycin, 2mM L-glutamine), 5ug/mL  
717 Olio6-CD4ko peptide megapool, or 1ng/mL SEB (positive control, Toxin Technology, Inc.). After 18  
718 hours, cells were stained and acquired on FACSCelesta (BD Biosciences).

719

720 Dose escalation study: About 50% of lymphocytes are lost during the freeze-thaw process. To maximize  
721 the number of viable cells to identify Env-specific CD4<sup>+</sup> cells, cells were shipped overnight at 4°C to LJI.  
722 Cells were centrifuged and treated with DNase for 15 minutes, 37°C. Cells were washed, cultured for  
723 18 hours under the conditions described above. All values reported are background subtracted ((%  
724 OX40<sup>+</sup> 4-1BB<sup>+</sup> CD4<sup>+</sup> (Env-stimulated condition) - % OX40<sup>+</sup> 4-1BB<sup>+</sup> CD4<sup>+</sup> (unstimulated condition)).

725

726



## 727 **Whole genome sequencing and genome assembly**

728 High molecular weight (>50kb) genomic DNA was isolated from the kidney of a perfused, female rhesus  
729 macaque. A full genome 30kb library was prepared according to manufacturer's protocols. Sequencing  
730 was performed on a PacBio RS II (Pacific Biosciences). Genome assembly was performed using FALCON  
731 and FALCON-Unzip (Pacific Biosciences) (Chin et al., 2016). The final assembly contained 1633 contigs  
732 made up of 2.83 Gbp. The N50 contig length is 8.4Mbp, with a maximum contig length of 28.8Mbp.

733

## 734 **Immunoglobulin loci annotation**

735 Primary contigs from FALCON/FALCON-Unzip assemblies containing IG sequences were identified by  
736 aligning V, D, and J sequences from multiple sources, including sequences for RM and the crab-eating  
737 macaque (*Macaca fascicularis*) from the IMGT reference directory  
738 (<http://www.imgt.org/vquest/refseqh.html>) and (Corcoran et al., 2016) using BLAT (Kent, 2002). Gene  
739 annotation of primary contigs was carried out in two stages: (1) rough coordinates in each contig  
740 harboring putative V, D, and J segments were identified by mapping existing sequences (i.e., those  
741 noted above for contig identification, as well human IG D and J gene sequences from IMGT); followed  
742 by (2) manual curation, during which precise 5' and 3' gene segment boundaries were determined for  
743 each annotation, based on alignments to previously reported sequences, as well as the identification of  
744 flanking recombination signal sequence (RSS) heptamers within the contig assembly. Each gene  
745 annotation was assigned to a given subfamily based on the closest matching published sequence. Only  
746 ORF annotations lacking premature stop codons and/or insertion-deletions resulting in drastic  
747 frameshifts were considered.

748 Additional V gene allelic variants in the IGH, IGK, and IGL loci were identified by mapping PacBio  
749 raw reads back to IG-associated primary and alternate contigs from the FALCON/FALCON-Unzip  
750 assemblies using BLASR (Chaisson and Tesler, 2012). Putative heterozygous ORF genes were identified  
751 based on variants present in PacBio reads mapping to a given ORF locus (**Fig 6C**). To characterize  
752 putative alternate alleles, raw reads were partitioned and assembled locally at heterozygous ORFs using  
753 MsPAC (Rodriguez et al., *in prep*; <https://bitbucket.org/oscarlr/mspac>). Raw reads and assembled allelic  
754 variants were visually inspected in the context of primary and alternate FALCON/FALCON-Unzip contigs  
755 and confirmed using the Integrated Genomics Viewer (Robinson et al., 2011; Thorvaldsdóttir et al.,  
756 2013). To classify genes/alleles annotated from PacBio assembly data as "known" or "novel", sequences  
757 were cross-referenced with the RM IMGT reference database and publicly available sequences in the

758 NCBI nucleotide collection using BLAT and BLAST (<https://blast.ncbi.nlm.nih.gov/Blast.cgi>),  
759 respectively.

760

### 761 **Bulk BCR sequencing**

762 The protocol for rhesus macaque repertoire sequencing was obtained by courtesy of Dr. Daniel Douek,  
763 NIAID/VRC (Huang et al., 2016). Bulk Env-specific B cells were sorted into 350uL Qiagen RLT buffer. RNA  
764 was extracted using the RNeasy Micro-DNase Digest protocol (QIAGEN) on QIAcube automation  
765 platforms (Valencia, CA). Reverse transcription (RT) was performed using Clontech SMARTer cDNA  
766 template switching: 5' CDS oligo(dT) (12  $\mu$ M) was added to RNA and incubated at 72°C for 3 minutes  
767 and 4°C for at least 1 minute. The RT mastermix (5x RT Buffer (250 mM Tris-HCl (pH 8.3), 375 mM KCl,  
768 30 mM MgCl<sub>2</sub>), Dithiothreitol, DTT (20 mM), dNTP Mix (10 mM), RNase Out (40U/ $\mu$ L), SMARTer II A Oligo  
769 (12  $\mu$ M), Superscript II RT (200U/ $\mu$ L)) was added to the reaction and incubated at 42°C for 90 minutes  
770 and 70°C for 10 minutes. First-strand cDNA was purified using AMPure XP beads (Beckman Coulter).  
771 Following RT, two PCR rounds were carried out to generate immunoglobulin amplicon libraries  
772 compatible with Illumina sequencing. All oligos were ordered from Integrated DNA Technologies. The  
773 first PCR amplification was carried out using KAPA Real-Time Library Amplification Kit (Kapa  
774 Biosciences). cDNA was combined with master mix (2X KAPA PCR Master Mix, 12  $\mu$ M  $\mu$ L 5PIIA and 5  $\mu$ L  
775 IgG/IgK/IgL Constant Primer (2  $\mu$ M) (Francica et al., 2015)). The amplification was monitored using real-  
776 time PCR and was stopped during the exponential phase. The amplified products were again purified  
777 using AMPure XP beads. A second round of PCR amplification was carried out for addition of barcodes  
778 and Illumina adapter sequences: master mix (2X KAPA PCR Master Mix 2x, SYBR Green 1:10K, Nuclease-  
779 free water), 10  $\mu$ M of P5\_Seq BC\_XX 5PIIA, 10  $\mu$ M of P7\_ i7\_XX IgG/IgK/IgL and were combined with  
780 amplified Immunoglobulin from the first round PCR and amplified using real-time PCR monitoring. The  
781 P5\_Seq BC\_XX 5PIIA primers contain a randomized stretch of four to eight random nucleotides. This  
782 was followed by purification with AMPure XP beads. A final PCR step was performed for addition of  
783 remaining Illumina adaptors by mixing master mix (2X KAPA PCR Master Mix, 10  $\mu$ M P5\_Graft P5\_seq,  
784 Nuclease-free water), 10  $\mu$ M of P7\_ i7\_XX IgG/IgK/IgL oligo and amplified products from the previous  
785 PCR step followed by purification with AMPure XP beads. The quality of library was assessed using  
786 Agilent Bioanalyzer. The amplicon libraries were pooled and sequenced on an Illumina MiSeq as a 309  
787 paired-end run.

788

## 789 **Single cell RNA-seq**

790 Single cells were sorted by flow cytometry into 10 uL of QIAGEN RLT buffer. RNA was purified using  
791 RNACleanXP Solid Phase Reversible Immobilization (SPRI) beads (Beckman Coulter). Full-length cDNA  
792 amplification of single-cells was performed using a modified version of the SMART-Seq II protocol {Picelli  
793 2014}, as described previously {Upadhyay 2018}. Amplified cDNA was fragmented using Illumina  
794 Nextera XT DNA Library Preparation kits and dual-indexed barcodes were added to each sample.  
795 Libraries were validated using an Agilent 4200 TapeStation, pooled, and sequenced at 101 SR on an  
796 Illumina HiSeq 3000 to an average depth of 1 M reads in the Yerkes NHP Genomics Core  
797 ([http://www.yerkes.emory.edu/nhp\\_genomics\\_core/](http://www.yerkes.emory.edu/nhp_genomics_core/)).

798

## 799 **V gene and somatic hypermutation analyses**

800 Illumina bcl files from IgG, IgK and IgL amplicons were converted to fastq files using the bcl2fastq tool.  
801 FastQC v0.11.5 (Andrew, 2010) was used to check the quality of fastq files. The repertoire sequence  
802 analysis was carried out using the pRESTO 0.5.6, Change-O 0.3.12, Alakazam 0.2.10.999 and SHazaM  
803 0.1.9 packages from the ImmCantation pipeline (Gupta et al., 2015; Vander Heiden et al., 2014). Pre-  
804 processing was performed using tools in the pRESTO package. Paired-end reads were first assembled  
805 with AssemblePairs tool. Reads with a mean quality score of less than 20 were filtered out using FilterSeq.  
806 The MaskPrimers tool was used to remove the forward primers and the random nucleotides from the  
807 assembled sequences. Data from each of two technical replicates were combined. Duplicates were  
808 removed and the duplicate counts were obtained for each unique sequence using CollapseSeq.  
809 SplitSeq was used to select sequences that had duplicate counts of at least two to eliminate singletons  
810 that may arise due to sequencing errors. The pre-processed sequences were then annotated using  
811 IgBLAST v1.6.1 (Ye et al., 2013).

812

813 Since the IMGT database (Lefranc and Lefranc, 2001) is lacking several V genes, a custom IgBLAST  
814 database was created for V genes using sequences from the genomic assembly in this study or by  
815 combining sequences from previously published studies (Corcoran et al., 2016; Lefranc and Lefranc,  
816 2001; Ramesh et al., 2017; Sundling et al., 2012) and the sequences from the assembly in this study. The  
817 protein sequences for V genes from all these datasets were combined. The sequences were aligned  
818 using MUSCLE v3.8.1551 (Edgar, 2004) and only the V genes with complete sequence and no unknown  
819 amino acid (X) were selected. The corresponding nucleotide sequences of these V genes were clustered

820 using CD-HIT v4.7 (Fu et al., 2012) to remove 100% redundant sequences. The protein sequences for  
821 this non-redundant set were submitted to the IMGT DomainGapAlign tool (Ehrenmann and Lefranc,  
822 2011; Ehrenmann et al., 2010) to obtain gapped V sequences. Corresponding gaps were introduced in  
823 the nucleotide sequences and the positions for framework (FR) and complementarity-determining  
824 regions (CDR) regions determined using custom scripts. These sequences were used to create the  
825 IgBLAST database for V genes. The databases for J and D genes was obtained from the IgBLAST ftp site  
826 ([ftp://ftp.ncbi.nih.gov/blast/executables/igblast/release/internal\\_data/rhesus\\_monkey/](ftp://ftp.ncbi.nih.gov/blast/executables/igblast/release/internal_data/rhesus_monkey/)). The  
827 annotations from IgBLAST were saved into a Change-O database and functional sequences were  
828 selected using Change-O. The gene usage and clonal frequencies were obtained from the Alakazam  
829 package and SHM estimations were obtained from the SHazaM package.

830

831 To obtain paired heavy and light chain sequences from single cell RNA-Seq data, we used the BALDR  
832 pipeline, as previously described (Upadhyay et al., 2018), with the Unfiltered method for rhesus  
833 macaques.

834

### 835 **Lineage analysis**

836 For the quantification of B cell lineages, two independent analyses were performed with largely  
837 equivalent results.

838

839 Lineage analyses in figures 5 and S4 utilized only the sequences from the genomic assembly generated  
840 in this study. The annotations from IgBLAST were saved into a Change-O database and functional  
841 sequences were selected using Change-O. The functional sequences were assigned to a clone using a  
842 custom script based on the following criteria: (i) same V gene, (ii) same J gene, (iii) same CDR3 length  
843 and (iv) percentage identity of CDR3 nucleotide sequence > 85%. The analysis was also performed with  
844 the larger IgBLAST database with comparable results.

845

846 Phylogenetic trees were generated using the larger IgBLAST database described above. Lineage  
847 assignment was performed using a clustering procedure that exploited both germline inference and  
848 sequence similarity. Two sequences were deemed to potentially belong to the same lineage when: (i)  
849 their inferred UCA sequences (ignoring the junction and D region) are within 1% of each other (using a  
850 kmer-based distance approximation from (Kumar et al., 2018) for computational efficiency), tolerating

851 calls to closely related V and J genes; and (ii) when the length-normalized Levenshtein distance between  
852 their junction+D sequences is within 10%. The clustering algorithm itself maintains a set of candidate  
853 lineages, storing all sequences for each lineage, and each new sequence in turn is added to the lineage  
854 where the largest proportion of sequences match the above two criteria. If no existing candidate cluster  
855 has >50% of its reads match the new sequence, then that sequence is used to seed a new candidate  
856 cluster containing this sequence as its sole member. Where members of a lineage had different inferred  
857 UCA sequences, the modal UCA was chosen as the UCA for the entire lineage. This lineage clustering  
858 algorithm was implemented in the Julia language for scientific computing (v0.6.2). Each lineage was  
859 aligned with MAFFT (Kato and Standley, 2013), and phylogenetic trees were inferred using FastTree2  
860 (Price et al., 2010). Phylogenies were visualized using FigTree  
861 (<http://tree.bio.ed.ac.uk/software/figtree/>), using automated coloring and annotation scripts  
862 implemented in Julia.

863

#### 864 **ELISAs**

865 BG505 SOSIP, BG505 gp120 and His ELISAs: 96-well Maxisorp plates (Thermo Fisher Scientific) plates  
866 were coated with streptavidin at 2.5µg/mL (Thermo Fisher Scientific) overnight at 4C. Plates were  
867 washed with PBS + 0.05% Tween (PBS-T) three times. Biotinylated BG505, biotinylated His peptide  
868 conjugated to mouse CD1d or biotinylated gp120 was diluted to 1.0µg/mL in PBS + 1% BSA were  
869 captured for 2 hours, 37°C. Plates were washed three times and then blocked with PBS+ 3% BSA for 1  
870 hour, RT. Plasma samples or monoclonal antibodies were serially diluted in PBS + 1% BSA and  
871 incubated for 1 hour, RT. Plates were washed three times and horseradish peroxidase goat anti-rhesus  
872 IgG (H+L) secondary (Southern Biotech) was added at 1:3000 dilution in PBS + 1% PBS for 1 hour, RT.  
873 Plates were washed three times with PBS-T and absorption was measured at 450nm following addition  
874 of TMB substrate (Thermo Scientific). We calculated endpoint titers for BG505 SOSIP and His peptide  
875 ELISAs using GraphPad Prism v7.0. Antibody data panels show geometric mean titers with geometric  
876 SD.

877

878 Lectin-capture BG505 trimer ELISA: To maximize access to the base of the trimer, we utilized a lectin-  
879 capture assay. Env trimer is heavily glycosylated, except at the base. Capture with a lectin, which binds  
880 glycans, increases the likelihood that the base will be exposed more than in a streptavidin-capture ELISA.  
881 Half-area 96- well high binding plates (Corning) were coated with 5µg/mL lectin from *Galanthus nivalis*

882 (snowdrop) (Sigma) in PBS overnight at 4°C. Plates were washed with 0.05% PBS-Tween (PBS-T) three  
883 times. 1µg/ml BG505 trimer in PBS + 1% BSA was bound to plates for 2 hours at 37°C and then washed  
884 three times. Plates were blocked with PBS + 3% BSA for 1 hour, RT. Monoclonal antibodies were serially  
885 diluted in PBS + 1% BSA and incubated for 1.5 hours at RT. Plates were washed three times and  
886 incubated with horseradish peroxidase goat anti-rhesus IgG (H+L) secondary antibody (Southern  
887 Biotech) at 1:3000 in PBS + 1% BSA for 1 hr, RT. Plates were washed five times with PBS-T and absorption  
888 was measured at 450nm following addition of TMB substrate (Thermo Fisher Scientific).

889  
890 Cross-competition trimer ELISA: We used a modified lectin capture ELISA for this assay. Plates were  
891 coated with GNL and BG505 and blocked as previously described. Plates were incubated with 0 or  
892 10µg/mL PGT121 or 19R (fab) in PBS + 1% BSA for 1.5 hours at RT. Plates were washed three times with  
893 PBS-T. 5µg/mL of BDA1 (whole antibody) was added for 1 hour at RT and then washed three times with  
894 PBS-T before incubation with horseradish peroxidase goat anti-human IgG, Fcγ fragment specific  
895 (Jackson ImmunoResearch) at 1:5000 in PBS + 1% BSA for 1hr, RT. Plates were washed five times with  
896 PBS-T and absorption was measured at 450nm following addition of TMB substrate (Thermo Fisher  
897 Scientific).

898

## 899 **19R**

900 The genes encoding the 19R rhesus macaque IgG1 heavy chain and kappa light chain were synthesized  
901 and separately cloned into the pcDNA3.4 plasmid by Thermo Fisher Scientific. The 19R IgG was  
902 expressed in Expi293 cells and purified using Protein A by Thermo Fisher Scientific. 19R Fab was  
903 generated by digesting 19R IgG using the Pierce Fab Preparation Kit (Thermo Fisher Scientific).

904

## 905 **Pseudovirus neutralization assay**

906 Neutralization assays were performed as previously described (Pauthner et al., 2017). Neutralization  
907 titers are reported as IC<sub>50</sub> titers. All ELISA and neutralization Ab data panels show geometric mean titers  
908 with geometric SD.

909

## 910 **Monoclonal EM analysis**

911 The heavy and light chains of BDA1  
912 (HC:QVQLQESGPGLVKPSSETLSLTCAVSGASISYWWGWIRQPPGKGLEWIGEIIIGSSGSTNSNPSFKSRVTISK

913 DASKNQFSLNLSVTAADTAVYYCVRVGA AISLPFDYWGQGVLVTVSS, LC:  
914 SYELTQPPSVSVSPGQTARITCSGDALPKKYAYWFQQKPGQSPVLIYEDNKRPSGIPERFSGSSSGTVATLTISG  
915 AQVEDEGDYYCYSRHSSGNHGLFGGGTRLTVL) were codon-optimized, synthesized and cloned into  
916 pFUSE2ss-CHlg-hG1 and pFUSE2ss-CLlg-hI2, respectively, by GenScript. Antibodies were expressed  
917 and purified by GenScript. Fab was generated using Pierce Fab preparation kit (Thermo Fisher  
918 Scientific). 15  $\mu$ g of BG505 SOSIPv5.2 Env trimer (untagged) was complexed with 41  $\mu$ g BDa1 Fab at  
919 room temperature overnight in a total reaction volume of 50  $\mu$ L. The complex was diluted 1:20 with TBS  
920 and 3  $\mu$ L was applied to a glow-discharged, carbon-coated 400-mesh copper grid and blotted off after  
921 15 seconds. 3  $\mu$ L of 2% (w/v) uranyl formate stain was applied and immediately blotted off, followed by  
922 another application of 3  $\mu$ L of stain for 45 seconds, blotted once more, and allowed to air-dry. Images  
923 were collected via Leginon (Potter et al., 1999) using an FEI Talos microscope (1.98 Å/pixel; 72,000 $\times$   
924 magnification; 25 e<sup>-</sup>/Å<sup>2</sup>). Particles were picked from the raw images using DoG Picker (Voss et al., 2009).  
925 2D classification, 3D sorting and refinement of the complex was conducted using RELION 3.0b0 (Nakane  
926 et al., 2018).

927

### 928 **Polyclonal EM analysis**

929 Plasma from week 10 (bolus), week 12 (2 week pumps) or week 14 (4 week pumps) was diluted 4X with  
930 PBS and incubated with protein A sepharose beads (GE Healthcare) overnight at 4C. Resin was washed  
931 3X with PBS and eluted with 0.1M glycine pH2.5 and immediately neutralized with 1M Tris-HCL pH 8.  
932 Fabs were purified using Pierce Fab preparation kit (Thermo). Fab was generated using Pierce Fab  
933 Preparation Kit (Thermo Scientific). Reaction was incubated with protein A sepharose resin for 1 hour,  
934 RT. Fabs were buffer exchanged using Amicon ultra 0.5ml centrifugal filters (Millipore Sigma).

935

936 Upon buffer exchange into TBS, 0.5 to 0.8 mg of total Fab was incubated overnight with 10  $\mu$ g BG505  
937 trimers at RT in ~36  $\mu$ L total volume. The formed complexes were then separated from unbound Fab via  
938 size exclusion chromatography (SEC) using Superose 6 Increase 10/300 column (GE Healthcare)  
939 equilibrated with TBS. The flow-through fractions containing the complexes were pooled and  
940 concentrated using 100 kDa cutoff centrifugal filters (EMD Millipore). The final trimer concentration was  
941 adjusted to approximately 0.04 mg/mL prior to application onto carbon-coated copper grids.

942

943 Complexes were applied to glow-discharged, carbon-coated 400-mesh copper grids, followed by

944 applying 3  $\mu\text{L}$  of 2% (w/v) uranyl formate stain that was immediately blotted off, and followed by  
945 application of another 3  $\mu\text{L}$  of stain for 45–60 s, and blotted once more. Stained grids were allowed to  
946 air-dry and stored under ambient conditions until imaging. Images were collected via Legicon (Potter et  
947 al., 1999) using a Tecnai T12 electron microscopes operated at 120 kV;  $\times 52,000$  magnification; 2.05  
948  $\text{\AA}/\text{pixel}$ . In all cases, the electron dose was  $25 \text{ e}^-/\text{\AA}^2$ . Particles were picked from the raw images using  
949 DoG Picker (Voss et al., 2009) and placed into stacks using Appion software (Lander et al., 2009). 2D  
950 reference-free alignment was performed using iterative MSA/MRA (Sorzano et al., 2010). Finally, the  
951 particle stacks were then converted from IMAGIC to RELION-formatted MRC stacks and subjected to  
952 RELION 2.1 2D and 3D classification (Scheres, 2012).

953

### 954 **Histology**

955 Selected LNs were embedded in 3% low melting temperature agarose (Sigma-Aldrich), and then sliced  
956 into 350  $\mu\text{m}$ -thick sections using a vibratome. The slices were blocked and permeabilized for 2 days in  
957 PBS with 10% goat serum and 0.2% Triton-X-100, followed by staining for 3 days with BV421-labeled  
958 mouse anti-human CD35 clone E11 (BD Biosciences) and Alexa Fluor 488-labeled mouse anti-Ki67 clone  
959 B56 (BD Biosciences) in the blocking buffer. Stained slices were then washed for 3 days with PBS  
960 containing 0.2% Tween-20, and then mounted onto glass slides with coverslips. Imaging was performed  
961 on either a Leica SP8 or an Olympus FV1200 laser scanning confocal microscope using 10x objectives.  
962 Images were analyzed using ImageJ.

963

### 964 **QUANTIFICATION AND STATISTICAL ANALYSIS**

965 Graphpad Prism 7.0 was used for all statistical analyses. Significance of differences in neutralization,  
966 BG505 binding titers, cellular frequencies and geoMFI were calculated using unpaired, two-tailed Mann-  
967 Whitney U tests. Differences in mutation frequencies between groups were calculated using unpaired  
968 Student's t tests. Significance of differences in V gene use between groups were calculated using  
969 multiple t tests, corrected for multiple comparisons with a false discovery rate (FDR) of 5% (Benjamini,  
970 Krieger, and Yekutieli). Differences in BCR expression of GC vs non-GC B cells were calculated using  
971 paired, Wilcoxon test. Correlations between neutralization and cell frequencies were calculated using  
972 log transformed Ab titer values in two-tailed Pearson correlation tests.

973

974



975 **DATA AND SOFTWARE AVAILABILITY**

976 The rhesus macaque germline Ig V, D and J reference genes and Env-specific B cell BCR sequences  
977 used in this paper are available at NCBI Sequence Read Archive (<https://www.ncbi.nlm.nih.gov/sra>). 3D  
978 EM reconstructions have been deposited in the Electron Microscopy Databank  
979 (<http://www.emdatabank.org/>) under the accession numbers listed in the Key Resources Table.

980

| <b>Lymph node GC Panel</b> |                      |                 |              |
|----------------------------|----------------------|-----------------|--------------|
| <b>Marker</b>              | <b>Fluorochrome</b>  | <b>Company</b>  | <b>Clone</b> |
| Env probe-biotin           | Alexa Fluor 647      | Invitrogen      |              |
| Env probe-biotin           | Brilliant Violet 421 | BioLegend       |              |
| Viability                  | eFluor506            | Thermo Fisher   |              |
| CD20                       | PE-Texas Red         | Beckman Coulter | 2H7          |
| CD4                        | Brilliant Violet 650 | Biolegend       | OKT-4        |
| CD8a                       | Qdot 705             | Thermo Fisher   | 3B5          |
| IgG                        | PE-Cy7               | BD Biosciences  | G18-145      |
| CXCR5                      | PE                   | Thermo Fisher   | MU5UBEE      |
| PD1                        | Brilliant Violet 605 | Biolegend       | EH12.2H7     |
| CD3                        | Brilliant Violet 786 | BD Biosciences  | SP34-2       |
| IgM                        | PerCP-Cy5.5          | BD Biosciences  | G20-127      |
| Ki67                       | Alexa Fluor 700      | BD Biosciences  | B56          |
| Bcl6                       | Alexa Fluor 488      | BD Biosciences  | K112-91      |

981

| <b>Antigen-specific B cell sorts</b> |                      |                |              |
|--------------------------------------|----------------------|----------------|--------------|
| <b>Marker</b>                        | <b>Fluorochrome</b>  | <b>Company</b> | <b>Clone</b> |
| Env probe-biotin                     | Alexa Fluor 647      | Invitrogen     |              |
| Env probe-biotin                     | Brilliant Violet 421 | BioLegend      |              |
| Viability                            | eFluor780            | Thermo Fisher  |              |
| CD4                                  | APC eFluor780        | Thermo Fisher  | SK3          |
| CD8a                                 | APC eFluor780        | Thermo Fisher  | RPA-T8       |
| CD16                                 | APC eFluor780        | Thermo Fisher  | ebioCD16     |

|      |                 |                         |         |
|------|-----------------|-------------------------|---------|
| CD20 | Alexa Fluor 488 | BioLegend               | 2H7     |
| IgG  | PE-Cy7          | BD Biosciences          | G18-145 |
| IgM  | PerCP-Cy5.5     | BD Biosciences          | G20-127 |
| CD38 | PE              | NHP Reagents            | OKT     |
| CD71 | PE-CF594        | BD Biosciences (custom) | L01.1   |

982

| <b>AIM Assay Panel</b> |                      |                |              |
|------------------------|----------------------|----------------|--------------|
| <b>Marker</b>          | <b>Fluorochrome</b>  | <b>Company</b> | <b>Clone</b> |
| CD4                    | Brilliant Violet 650 | BioLegend      | OKT4         |
| CD20                   | Brilliant Violet 570 | BioLegend      | 2H7          |
| PD1                    | Brilliant Violet 785 | BioLegend      | EH12.2H7     |
| CXCR5                  | PE-Cy7               | Thermo Fisher  | MU5UBEE      |
| CD25                   | FITC                 | BioLegend      | BC96         |
| OX40                   | PE                   | BD Biosciences | L106         |
| 4-1BB                  | APC                  | BioLegend      | 4B4-1        |
| Viability              | efluor780            | Thermo Fisher  |              |
| CD8a                   | APC efluor780        | Thermo Fisher  | RPA-T8       |
| CD14                   | APC/Cy7              | BioLegend      | M5E2         |
| CD16                   | APC/Cy7              | BioLegend      | 3G8          |

983

| <b>GC B cell surface marker validation</b> |                      |                         |              |
|--------------------------------------------|----------------------|-------------------------|--------------|
| <b>Marker</b>                              | <b>Fluorochrome</b>  | <b>Company</b>          | <b>Clone</b> |
| Viability                                  | efluor780            | Thermo Fisher           |              |
| CD20                                       | Brilliant Violet 650 | BioLegend               | 2H7          |
| CD8a                                       | APC efluor780        | Thermo Fisher           | RPA-T8       |
| CD4                                        | APC                  | BioLegend               | OKT4         |
| CD38                                       | PE                   | NHP Reagents            | OKT          |
| CD71                                       | PE-CF594             | BD Biosciences (custom) | L01.1        |
| Bcl6                                       | BV421                | BD Biosciences          | K112-91      |
| Ki67                                       | Alexa Fluor 700      | BD Biosciences          | B56          |

984

985

| <b>Macaque BCR expression</b> |                      |                  |              |
|-------------------------------|----------------------|------------------|--------------|
| <b>Marker</b>                 | <b>Fluorochrome</b>  | <b>Company</b>   | <b>Clone</b> |
| Viability                     | efluor780            | Thermo Fisher    |              |
| CD4                           | APC efluor780        | Thermo Fisher    | SK3          |
| CD8a                          | APC efluor780        | Thermo Fisher    | RPA-T8       |
| CD16                          | APC/Cy7              | BioLegend        | 3G8          |
| CD20                          | Brilliant Violet 650 | BioLegend        | 2H7          |
| Bcl6                          | Alexa Fluor 647      | BD Biosciences   | K112-91      |
| Ki67                          | Alexa Fluor 700      | BD Biosciences   | B56          |
| IgM                           | BV421                | BD Biosciences   | G20-127      |
| IgG                           | PE                   | BD Biosciences   | G18-145      |
| IgD                           | Alexa Fluor 488      | Southern Biotech |              |
| Lambda                        | Biotin               | Miltenyi         | IS7-24C7     |
| Streptavidin                  | Brilliant Violet 711 | BioLegend        |              |

986

987

988

989

990

991

992

993

994

995

996

997

998

999

1000

1001

1002 **REFERENCES**

- 1003 Abbott, R.K., Lee, J.H., Menis, S., Skog, P., Rossi, M., Ota, T., Kulp, D.W., Bhullar, D., Kalyuzhniy, O.,  
1004 Havenar-Daughton, C., et al. (2018). Precursor Frequency and Affinity Determine B Cell Competitive  
1005 Fitness in Germinal Centers, Tested with Germline-Targeting HIV Vaccine Immunogens. *Immunity* 48,  
1006 133-146.e136.
- 1007 Alkan, C., Sajjadian, S., and Eichler, E.E. (2011). Limitations of next-generation genome sequence  
1008 assembly. *Nat. Methods* 8, 61-65.
- 1009 Andrew, S. (2010). FastQC: A quality control tool for high throughput sequence data. 2010.
- 1010 Andrews, S.F., Graham, B.S., Mascola, J.R., and McDermott, A.B. (2018). Is It Possible to Develop a  
1011 "Universal" Influenza Virus Vaccine? Immunogenetic Considerations Underlying B-Cell Biology in the  
1012 Development of a Pan-Subtype Influenza A Vaccine Targeting the Hemagglutinin Stem. *Cold Spring  
1013 Harb Perspect Biol* 10, a029413.
- 1014 Angeletti, D., and Yewdell, J.W. (2018). Understanding and Manipulating Viral Immunity: Antibody  
1015 Immunodominance Enters Center Stage. *Trends Immunol.* 39, 549-561.
- 1016 Angeletti, D., Gibbs, J.S., Angel, M., Kosik, I., Hickman, H.D., Frank, G.M., Das, S.R., Wheatley, A.K.,  
1017 Prabhakaran, M., Leggat, D.J., et al. (2017). Defining B cell immunodominance to viruses. *Nat.  
1018 Immunol.* 18, 456-463.
- 1019 Baiyegunhi, O., Ndlovu, B., Ogunshola, F., Ismail, N., Walker, B.D., Ndung'u, T., and Ndhlovu, Z.M.  
1020 (2018). Frequencies of Circulating Th1-Biased T Follicular Helper Cells in Acute HIV-1 Infection  
1021 Correlate with the Development of HIV-Specific Antibody Responses and Lower Set Point Viral Load. *J.  
1022 Virol.* 92, 2209.
- 1023 Bianchi, M., Turner, H.L., Nogal, B., Cottrell, C.A., Oyen, D., Pauthner, M., Bastidas, R., Nedellec, R.,  
1024 McCoy, L.E., Wilson, I.A., et al. (2018). Electron-Microscopy-Based Epitope Mapping Defines  
1025 Specificities of Polyclonal Antibodies Elicited during HIV-1 BG505 Envelope Trimer Immunization.  
1026 *Immunity* 49, 288-300.e288.
- 1027 Burton, D.R., and Hangartner, L. (2016). Broadly Neutralizing Antibodies to HIV and Their Role in  
1028 Vaccine Design. *Annu. Rev. Immunol.* 34, 635-659.
- 1029 Chaisson, M.J., and Tesler, G. (2012). Mapping single molecule sequencing reads using basic local  
1030 alignment with successive refinement (BLASR): application and theory. *BMC Bioinformatics* 13, 238.
- 1031 Chin, C.-S., Peluso, P., Sedlazeck, F.J., Nattestad, M., Concepcion, G.T., Clum, A., Dunn, C., O'Malley,  
1032 R., Figueroa-Balderas, R., Morales-Cruz, A., et al. (2016). Phased diploid genome assembly with single-  
1033 molecule real-time sequencing. *Nat. Methods* 13, 1050-1054.
- 1034 Chowdhury, A., Del Rio, P.M.E., Tharp, G.K., Tribble, R.P., Amara, R.R., Chahroudi, A., Reyes-Teran, G.,  
1035 Bosinger, S.E., and Silvestri, G. (2015). Decreased T Follicular Regulatory Cell/T Follicular Helper Cell  
1036 (TFH) in Simian Immunodeficiency Virus-Infected Rhesus Macaques May Contribute to Accumulation of  
1037 TFH in Chronic Infection. *J. Immunol.* 195, 3237-3247.

- 1038 Cirelli, K.M., and Crotty, S. (2017). Germinal center enhancement by extended antigen availability.  
1039 *Curr. Opin. Immunol.* *47*, 64-69.
- 1040 Corcoran, M.M., Phad, G.E., Vázquez Bernat, N., Stahl-Hennig, C., Sumida, N., Persson, M.A.A., Martin,  
1041 M., and Karlsson Hedestam, G.B. (2016). Production of individualized V gene databases reveals high  
1042 levels of immunoglobulin genetic diversity. *Nat Commun* *7*, 13642.
- 1043 Crotty, S. (2014). T follicular helper cell differentiation, function, and roles in disease. *Immunity* *41*,  
1044 529-542.
- 1045 Dan, J.M., Lindestam Arlehamn, C.S., Weiskopf, D., da Silva Antunes, R., Havenar-Daughton, C., Reiss,  
1046 S.M., Brigger, M., Bothwell, M., Sette, A., and Crotty, S. (2016). A Cytokine-Independent Approach To  
1047 Identify Antigen-Specific Human Germinal Center T Follicular Helper Cells and Rare Antigen-Specific  
1048 CD4+ T Cells in Blood. *J. Immunol.* *197*, 983-993.
- 1049 DeMuth, P.C., Li, A.V., Abbink, P., Liu, J., Li, H., Stanley, K.A., Smith, K.M., Lavine, C.L., Seaman, M.S.,  
1050 Kramer, J.A., et al. (2013). Vaccine delivery with microneedle skin patches in nonhuman primates. *Nat.*  
1051 *Biotechnol.* *31*, 1082-1085.
- 1052 DeMuth, P.C., Min, Y., Irvine, D.J., and Hammond, P.T. (2014). Implantable silk composite  
1053 microneedles for programmable vaccine release kinetics and enhanced immunogenicity in  
1054 transcutaneous immunization. *Adv Healthc Mater* *3*, 47-58.
- 1055 Duan, H., Chen, X., Boyington, J.C., Cheng, C., Zhang, Y., Jafari, A.J., Stephens, T., Tsybovsky, Y.,  
1056 Kalyuzhniy, O., Zhao, P., et al. (2018). Glycan Masking Focuses Immune Responses to the HIV-1 CD4-  
1057 Binding Site and Enhances Elicitation of VRC01-Class Precursor Antibodies. *Immunity* *49*, 301-  
1058 311.e305.
- 1059 Edgar, R.C. (2004). MUSCLE: multiple sequence alignment with high accuracy and high throughput.  
1060 *Nucleic Acids Res.* *32*, 1792-1797.
- 1061 Ehrenmann, F., and Lefranc, M.-P. (2011). IMGT/DomainGapAlign: IMGT standardized analysis of  
1062 amino acid sequences of variable, constant, and groove domains (IG, TR, MH, IgSF, MhSF). *Cold*  
1063 *Spring Harb Protoc* *2011*, 737-749.
- 1064 Ehrenmann, F., Kaas, Q., and Lefranc, M.-P. (2010). IMGT/3Dstructure-DB and IMGT/DomainGapAlign:  
1065 a database and a tool for immunoglobulins or antibodies, T cell receptors, MHC, IgSF and MhcSF.  
1066 *Nucleic Acids Res.* *38*, D301-D307.
- 1067 Feng, Y., Tran, K., Bale, S., Kumar, S., Guenaga, J., Wilson, R., de Val, N., Arendt, H., DeStefano, J.,  
1068 Ward, A.B., et al. (2016). Thermostability of Well-Ordered HIV Spikes Correlates with the Elicitation of  
1069 Autologous Tier 2 Neutralizing Antibodies. *PLoS Pathog.* *12*, e1005767.
- 1070 Francica, J.R., Sheng, Z., Zhang, Z., Nishimura, Y., Shingai, M., Ramesh, A., Keele, B.F., Schmidt, S.D.,  
1071 Flynn, B.J., Darko, S., et al. (2015). Analysis of immunoglobulin transcripts and hypermutation following  
1072 SHIV(AD8) infection and protein-plus-adjuvant immunization. *Nat Commun* *6*, 6565.

- 1073 Fu, L., Niu, B., Zhu, Z., Wu, S., and Li, W. (2012). CD-HIT: accelerated for clustering the next-generation  
1074 sequencing data. *Bioinformatics* 28, 3150-3152.
- 1075 Gibbs, R.A., Rogers, J., Katze, M.G., Bumgarner, R., Weinstock, G.M., Mardis, E.R., Remington, K.A.,  
1076 Strausberg, R.L., Venter, J.C., Wilson, R.K., et al. (2007). Evolutionary and biomedical insights from the  
1077 rhesus macaque genome. *Science* 316, 222-234.
- 1078 Gitlin, A.D., Mayer, C.T., Oliveira, T.Y., Shulman, Z., Jones, M.J.K., Koren, A., and Nussenzweig, M.C.  
1079 (2015). HUMORAL IMMUNITY. T cell help controls the speed of the cell cycle in germinal center B cells.  
1080 *Science* 349, 643-646.
- 1081 Gitlin, A.D., Shulman, Z., and Nussenzweig, M.C. (2014). Clonal selection in the germinal centre by  
1082 regulated proliferation and hypermutation. *Nature* 509, 637-640.
- 1083 Gupta, N.T., Vander Heiden, J.A., Uduman, M., Gadala-Maria, D., Yaari, G., and Kleinstein, S.H. (2015).  
1084 Change-O: a toolkit for analyzing large-scale B cell immunoglobulin repertoire sequencing data.  
1085 *Bioinformatics* 31, 3356-3358.
- 1086 Havenar-Daughton, C., Abbott, R.K., Schief, W.R., and Crotty, S. (2018). When designing vaccines,  
1087 consider the starting material: the human B cell repertoire. *Curr. Opin. Immunol.* 53, 209-216.
- 1088 Havenar-Daughton, C., Carnathan, D.G., Torrents de la Peña, A., Pauthner, M., Briney, B., Reiss, S.M.,  
1089 Wood, J.S., Kaushik, K., van Gils, M.J., Rosales, S.L., et al. (2016a). Direct Probing of Germinal Center  
1090 Responses Reveals Immunological Features and Bottlenecks for Neutralizing Antibody Responses to  
1091 HIV Env Trimer. *Cell Rep* 17, 2195-2209.
- 1092 Havenar-Daughton, C., Lee, J.H., and Crotty, S. (2017). Tfh cells and HIV bnAbs, an immunodominance  
1093 model of the HIV neutralizing antibody generation problem. *Immunological Reviews* 275, 49-61.
- 1094 Havenar-Daughton, C., Reiss, S.M., Carnathan, D.G., Wu, J.E., Kendric, K., Torrents de la Peña, A.,  
1095 Kasturi, S.P., Dan, J.M., Bothwell, M., Sanders, R.W., et al. (2016b). Cytokine-Independent Detection of  
1096 Antigen-Specific Germinal Center T Follicular Helper Cells in Immunized Nonhuman Primates Using a  
1097 Live Cell Activation-Induced Marker Technique. *J. Immunol.* 197, 994-1002.
- 1098 Haynes, B.F., Gilbert, P.B., McElrath, M.J., Zolla-Pazner, S., Tomaras, G.D., Alam, S.M., Evans, D.T.,  
1099 Montefiori, D.C., Karnasuta, C., Sutthent, R., et al. (2012). Immune-correlates analysis of an HIV-1  
1100 vaccine efficacy trial. *N. Engl. J. Med.* 366, 1275-1286.
- 1101 Hogenesch, H. (2002). Mechanisms of stimulation of the immune response by aluminum adjuvants.  
1102 *Vaccine* 20, S34-S39.
- 1103 Hogenesch, H. (2012). Mechanism of immunopotentiality and safety of aluminum adjuvants. *Front*  
1104 *Immunol* 3, 406.
- 1105 Hu, J.K., Crampton, J.C., Cupo, A., Ketas, T., van Gils, M.J., Sliepen, K., de Taeye, S.W., Sok, D.,  
1106 Ozorowski, G., Deresa, I., et al. (2015). Murine Antibody Responses to Cleaved Soluble HIV-1 Envelope  
1107 Trimers Are Highly Restricted in Specificity. *J. Virol.* 89, 10383-10398.

- 1108 Huang, J., Kang, B.H., Ishida, E., Zhou, T., Griesman, T., Sheng, Z., Wu, F., Doria-Rose, N.A., Zhang, B.,  
1109 McKee, K., et al. (2016). Identification of a CD4-Binding-Site Antibody to HIV that Evolved Near-Pan  
1110 Neutralization Breadth. *Immunity* 45, 1108-1121.
- 1111 Hutchison, S., Benson, R.A., Gibson, V.B., Pollock, A.H., Garside, P., and Brewer, J.M. (2012). Antigen  
1112 depot is not required for alum adjuvanticity. *Faseb J.* 26, 1272-1279.
- 1113 Jardine, J.G., Kulp, D.W., Havenar-Daughton, C., Sarkar, A., Briney, B., Sok, D., Sesterhenn, F., Ereño-  
1114 Orbea, J., Kalyuzhnyi, O., Deresa, I., et al. (2016). HIV-1 broadly neutralizing antibody precursor B cells  
1115 revealed by germline-targeting immunogen. *Science* 351, 1458-1463.
- 1116 Julien, J.-P., Cupo, A., Sok, D., Stanfield, R.L., Lyumkis, D., Deller, M.C., Klasse, P.J., Burton, D.R.,  
1117 Sanders, R.W., Moore, J.P., et al. (2013). Crystal structure of a soluble cleaved HIV-1 envelope trimer.  
1118 *Science* 342, 1477-1483.
- 1119 Katoh, K., and Standley, D.M. (2013). MAFFT Multiple Sequence Alignment Software Version 7:  
1120 Improvements in Performance and Usability. *Molecular Biology and Evolution* 30, 772-780.
- 1121 Kent, W.J. (2002). BLAT--the BLAST-like alignment tool. *Genome Res.* 12, 656-664.
- 1122 Klasse, P.J., Ketas, T.J., Cottrell, C.A., Ozorowski, G., Debnath, G., Camara, D., Francomano, E., Pugach,  
1123 P., Ringe, R.P., LaBranche, C.C., et al. (2018). Epitopes for neutralizing antibodies induced by HIV-1  
1124 envelope glycoprotein BG505 SOSIP trimers in rabbits and macaques. *PLoS Pathog.* 14, e1006913.
- 1125 Klein, F., Mouquet, H., Dosenovic, P., Scheid, J.F., Scharf, L., and Nussenzweig, M.C. (2013). Antibodies  
1126 in HIV-1 vaccine development and therapy. *Science* 341, 1199-1204.
- 1127 Kong, R., Xu, K., Zhou, T., Acharya, P., Lemmin, T., Liu, K., Ozorowski, G., Soto, C., Taft, J.D., Bailer, R.T.,  
1128 et al. (2016). Fusion peptide of HIV-1 as a site of vulnerability to neutralizing antibody. *Science* 352,  
1129 828-833.
- 1130 Kulp, D.W., Steichen, J.M., Pauthner, M., Hu, X., Schiffner, T., Liguori, A., Cottrell, C.A., Havenar-  
1131 Daughton, C., Ozorowski, G., Georgeson, E., et al. (2017). Structure-based design of native-like HIV-1  
1132 envelope trimers to silence non-neutralizing epitopes and eliminate CD4 binding. *Nat Commun* 8,  
1133 1655.
- 1134 Kumar, V., Vollbrecht, T., Chernyshev, M., Mohan, S., Hanst, B., Bavafa, N., Lorenzo, A., Ketteringham,  
1135 R., Eren, K., Golden, M., et al. (2018). Long-read amplicon denoising. 1-10.
- 1136 Kuraoka, M., Schmidt, A.G., Nojima, T., Feng, F., Watanabe, A., Kitamura, D., Harrison, S.C., Kepler,  
1137 T.B., and Kelsoe, G. (2016). Complex Antigens Drive Permissive Clonal Selection in Germinal Centers.  
1138 *Immunity* 44, 542-552.
- 1139 Lander, G.C., Stagg, S.M., Voss, N.R., Cheng, A., Fellmann, D., Pulokas, J., Yoshioka, C., Irving, C.,  
1140 Mulder, A., Lau, P.-W., et al. (2009). Appion: an integrated, database-driven pipeline to facilitate EM  
1141 image processing. *J. Struct. Biol.* 166, 95-102.
- 1142 Lefranc, M.P., and Lefranc, G. (2001). The immunoglobulin factsbook.

- 1143 Locci, M., Havenar-Daughton, C., Landais, E., Wu, J., Kroenke, M.A., Arlehamn, C.L., Su, L.F., Cubas, R.,  
1144 Davis, M.M., Sette, A., et al. (2013). Human circulating PD-1+CXCR3-CXCR5+ memory Tfh cells are  
1145 highly functional and correlate with broadly neutralizing HIV antibody responses. *Immunity* 39, 758-  
1146 769.
- 1147 Lövgren-Bengtsson, K., and Morein, B. (2000). The ISCOM™ Technology. In *Vaccine Adjuvants*, (New  
1148 Jersey: Humana Press), pp. 239-258.
- 1149 Lyumkis, D., Julien, J.-P., de Val, N., Cupo, A., Potter, C.S., Klasse, P.J., Burton, D.R., Sanders, R.W.,  
1150 Moore, J.P., Carragher, B., et al. (2013). Cryo-EM structure of a fully glycosylated soluble cleaved HIV-1  
1151 envelope trimer. *Science* 342, 1484-1490.
- 1152 Mascola, J.R., Snyder, S.W., Weislow, O.S., Belay, S.M., Belshe, R.B., Schwartz, D.H., Clements, M.L.,  
1153 Dolin, R., Graham, B.S., Gorse, G.J., et al. (1996). Immunization with envelope subunit vaccine products  
1154 elicits neutralizing antibodies against laboratory-adapted but not primary isolates of human  
1155 immunodeficiency virus type 1. The National Institute of Allergy and Infectious Diseases AIDS Vaccine  
1156 Evaluation Group. *J. Infect. Dis.* 173, 340-348.
- 1157 Mesin, L., Ersching, J., and Victora, G.D. (2016). Germinal Center B Cell Dynamics. *Immunity* 45, 471-  
1158 482.
- 1159 Montefiori, D.C., Roederer, M., Morris, L., and Seaman, M.S. (2018). Neutralization tiers of HIV-1. *Curr*  
1160 *Opin HIV AIDS* 13, 128-136.
- 1161 Moody, M.A., Pedroza-Pacheco, I., Vandergrift, N.A., Chui, C., Lloyd, K.E., Parks, R., Soderberg, K.A.,  
1162 Ogbe, A.T., Cohen, M.S., Liao, H.-X., et al. (2016). Immune perturbations in HIV-1-infected individuals  
1163 who make broadly neutralizing antibodies. *Science Immunology* 1, aag0851-aag0851.
- 1164 Nakane, T., Kimanius, D., Lindahl, E., and Scheres, S.H. (2018). Characterisation of molecular motions in  
1165 cryo-EM single-particle data by multi-body refinement in RELION. *Elife* 7, 1485.
- 1166 Nishimura, Y., and Martin, M.A. (2017). Of Mice, Macaques, and Men: Broadly Neutralizing Antibody  
1167 Immunotherapy for HIV-1. *Cell Host Microbe* 22, 207-216.
- 1168 Noe, S.M., Green, M.A., Hogenesch, H., and Hem, S.L. (2010). Mechanism of immunopotentiality by  
1169 aluminum-containing adjuvants elucidated by the relationship between antigen retention at the  
1170 inoculation site and the immune response. *Vaccine* 28, 3588-3594.
- 1171 Pauthner, M., Havenar-Daughton, C., Sok, D., Nkolola, J.P., Bastidas, R., Boopathy, A.V., Carnathan,  
1172 D.G., Chandrashekar, A., Cirelli, K.M., Cottrell, C.A., et al. (2017). Elicitation of Robust Tier 2  
1173 Neutralizing Antibody Responses in Nonhuman Primates by HIV Envelope Trimer Immunization Using  
1174 Optimized Approaches. *Immunity* 46, 1073-1088.e1076.
- 1175 Petrovas, C., Yamamoto, T., Gerner, M.Y., Boswell, K.L., Wloka, K., Smith, E.C., Ambrozak, D.R., Sandler,  
1176 N.G., Timmer, K.J., Sun, X., et al. (2012). CD4 T follicular helper cell dynamics during SIV infection. *J.*  
1177 *Clin. Invest.* 122, 3281-3294.



- 1178 Plotkin, S.A. (2010). Correlates of protection induced by vaccination. *Clin. Vaccine Immunol.* *17*, 1055-  
1179 1065.
- 1180 Potter, C.S., Chu, H., Frey, B., Green, C., Kisseberth, N., Madden, T.J., Miller, K.L., Nahrstedt, K.,  
1181 Pulokas, J., Reilein, A., et al. (1999). Leginon: a system for fully automated acquisition of 1000 electron  
1182 micrographs a day. *Ultramicroscopy* *77*, 153-161.
- 1183 Price, M.N., Dehal, P.S., and Arkin, A.P. (2010). FastTree 2--approximately maximum-likelihood trees  
1184 for large alignments. *PLoS ONE* *5*, e9490.
- 1185 Ramesh, A., Darko, S., Hua, A., Overman, G., Ransier, A., Francica, J.R., Trama, A., Tomaras, G.D.,  
1186 Haynes, B.F., Douek, D.C., et al. (2017). Structure and Diversity of the Rhesus Macaque  
1187 Immunoglobulin Loci through Multiple De Novo Genome Assemblies. *Front Immunol* *8*, 220-19.
- 1188 Rerks-Ngarm, S., Pitisuttithum, P., Nitayaphan, S., Kaewkungwal, J., Chiu, J., Paris, R., Prensri, N.,  
1189 Namwat, C., de Souza, M., Adams, E., et al. (2009). Vaccination with ALVAC and AIDSVAX to prevent  
1190 HIV-1 infection in Thailand. *N. Engl. J. Med.* *361*, 2209-2220.
- 1191 Richman, D.D., Wrin, T., Little, S.J., and Petropoulos, C.J. (2003). Rapid evolution of the neutralizing  
1192 antibody response to HIV type 1 infection. *Proceedings of the National Academy of Sciences* *100*,  
1193 4144-4149.
- 1194 Robinson, J.T., Thorvaldsdóttir, H., Winckler, W., Guttman, M., Lander, E.S., Getz, G., and Mesirov, J.P.  
1195 (2011). Integrative genomics viewer. *Nat. Biotechnol.* *29*, 24-26.
- 1196 Sanders, R.W., Derking, R., Cupo, A., Julien, J.-P., Yasmeen, A., de Val, N., Kim, H.J., Blattner, C., la  
1197 Peña, de, A.T., Korzun, J., et al. (2013). A next-generation cleaved, soluble HIV-1 Env trimer, BG505  
1198 SOSIP.664 gp140, expresses multiple epitopes for broadly neutralizing but not non-neutralizing  
1199 antibodies. *PLoS Pathog.* *9*, e1003618.
- 1200 Sanders, R.W., van Gils, M.J., Derking, R., Sok, D., Ketas, T.J., Burger, J.A., Ozorowski, G., Cupo, A.,  
1201 Simonich, C., Goo, L., et al. (2015). HIV-1 VACCINES. HIV-1 neutralizing antibodies induced by native-  
1202 like envelope trimers. *Science* *349*, aac4223-aac4223.
- 1203 Scheres, S.H.W. (2012). RELION: implementation of a Bayesian approach to cryo-EM structure  
1204 determination. *J. Struct. Biol.* *180*, 519-530.
- 1205 Schwickert, T.A., Vitorica, G.D., Fooksman, D.R., Kamphorst, A.O., Mugnier, M.R., Gitlin, A.D., Dustin,  
1206 M.L., and Nussenzweig, M.C. (2011). A dynamic T cell-limited checkpoint regulates affinity-dependent  
1207 B cell entry into the germinal center. *J. Exp. Med.* *208*, 1243-1252.
- 1208 Shi, Y., Hogenesch, H., and Hem, S.L. (2001). Change in the degree of adsorption of proteins by  
1209 aluminum-containing adjuvants following exposure to interstitial fluid: freshly prepared and aged  
1210 model vaccines. *Vaccine* *20*, 80-85.
- 1211 Sorzano, C.O.S., Bilbao-Castro, J.R., Shkolnisky, Y., Alcorlo, M., Melero, R., Caffarena-Fernández, G., Li,  
1212 M., Xu, G., Marabini, R., and Carazo, J.M. (2010). A clustering approach to multireference alignment of  
1213 single-particle projections in electron microscopy. *J. Struct. Biol.* *171*, 197-206.

- 1214 Stewart-Jones, G.B.E., Soto, C., Lemmin, T., Chuang, G.-Y., Druz, A., Kong, R., Thomas, P.V., Wagh, K.,  
1215 Zhou, T., Behrens, A.-J., et al. (2016). Trimeric HIV-1-Env Structures Define Glycan Shields from Clades  
1216 A, B, and G. *Cell* *165*, 813–826.
- 1217 Sundling, C., Phad, G., Douagi, I., Navis, M., and Karlsson Hedestam, G.B. (2012). Isolation of antibody  
1218 V(D)J sequences from single cell sorted rhesus macaque B cells. *J. Immunol. Methods* *386*, 85–93.
- 1219 Tam, H.H., Melo, M.B., Kang, M., Pelet, J.M., Ruda, V.M., Foley, M.H., Hu, J.K., Kumari, S., Crampton, J.,  
1220 Baldeon, A.D., et al. (2016). Sustained antigen availability during germinal center initiation enhances  
1221 antibody responses to vaccination. *Proc. Natl. Acad. Sci. U.S.a.* *113*, 201606050–E201606648.
- 1222 Tas, J.M.J., Mesin, L., Pasqual, G., Targ, S., Jacobsen, J.T., Mano, Y.M., Chen, C.S., Weill, J.-C.,  
1223 Reynaud, C.-A., Browne, E.P., et al. (2016). Visualizing antibody affinity maturation in germinal centers.  
1224 *Science* *351*, 1048–1054.
- 1225 Thorvaldsdóttir, H., Robinson, J.T., and Mesirov, J.P. (2013). Integrative Genomics Viewer (IGV): high-  
1226 performance genomics data visualization and exploration. *Brief. Bioinformatics* *14*, 178–192.
- 1227 Turner, J.S., Benet, Z.L., and Grigorova, I.L. (2017). Antigen Acquisition Enables Newly Arriving B Cells  
1228 To Enter Ongoing Immunization-Induced Germinal Centers. *J. Immunol.* *199*, 1301–1307.
- 1229 Upadhyay, A.A., Kauffman, R.C., Wolabaugh, A.N., Cho, A., Patel, N.B., Reiss, S.M., Havenar-Daughton,  
1230 C., Dawoud, R.A., Tharp, G.K., Sanz, I., et al. (2018). BALDR: a computational pipeline for paired heavy  
1231 and light chain immunoglobulin reconstruction in single-cell RNA-seq data. *Genome Med* *10*, 20.
- 1232 Vander Heiden, J.A., Yaari, G., Uduman, M., Stern, J.N.H., O'Connor, K.C., Hafler, D.A., Vigneault, F.,  
1233 and Kleinstein, S.H. (2014). pRESTO: a toolkit for processing high-throughput sequencing raw reads of  
1234 lymphocyte receptor repertoires. *Bioinformatics* *30*, 1930–1932.
- 1235 Victora, G.D., and Wilson, P.C. (2015). Germinal center selection and the antibody response to  
1236 influenza. *Cell* *163*, 545–548.
- 1237 Victora, G.D., Schwickert, T.A., Fooksman, D.R., Kamphorst, A.O., Meyer-Hermann, M., Dustin, M.L.,  
1238 and Nussenzweig, M.C. (2010). Germinal center dynamics revealed by multiphoton microscopy with a  
1239 photoactivatable fluorescent reporter. *Cell* *143*, 592–605.
- 1240 Vigdorovich, V., Oliver, B.G., Carbonetti, S., Dambrauskas, N., Lange, M.D., Yacoob, C., Leahy, W.,  
1241 Callahan, J., Stamatatos, L., and Sather, D.N. (2016). Repertoire comparison of the B-cell receptor-  
1242 encoding loci in humans and rhesus macaques by next-generation sequencing. *Clin Transl*  
1243 *Immunology* *5*, e93.
- 1244 Voss, N.R., Yoshioka, C.K., Radermacher, M., Potter, C.S., and Carragher, B. (2009). DoG Picker and  
1245 TiltPicker: software tools to facilitate particle selection in single particle electron microscopy. *J. Struct.*  
1246 *Biol.* *166*, 205–213.
- 1247 Watson, C.T., and Breden, F. (2012). The immunoglobulin heavy chain locus: genetic variation, missing  
1248 data, and implications for human disease. *Genes Immun.* *13*, 363–373.

- 1249 Watson, C.T., Glanville, J., and Marasco, W.A. (2017). The Individual and Population Genetics of  
1250 Antibody Immunity. *Trends Immunol.* *38*, 459-470.
- 1251 Wei, X., Decker, J.M., Wang, S., Hui, H., Kappes, J.C., Wu, X., Salazar-Gonzalez, J.F., Salazar, M.G.,  
1252 Kilby, J.M., Saag, M.S., et al. (2003). Antibody neutralization and escape by HIV-1. *Nature* *422*, 307-  
1253 312.
- 1254 Weissburg, R.P., Berman, P.W., Cleland, J.L., Eastman, D., Farina, F., Frie, S., Lim, A., Mordenti, J.,  
1255 Peterson, M.R., Yim, K., et al. (1995). Characterization of the MN gp120 HIV-1 Vaccine: Antigen Binding  
1256 to Alum. *Pharmaceutical Research* *12*, 1439-1446.
- 1257 West, A.P., Scharf, L., Scheid, J.F., Klein, F., Bjorkman, P.J., and Nussenzweig, M.C. (2014). Structural  
1258 insights on the role of antibodies in HIV-1 vaccine and therapy. *Cell* *156*, 633-648.
- 1259 Yamamoto, T., Lynch, R.M., Gautam, R., Matus-Nicodemos, R., Schmidt, S.D., Boswell, K.L., Darko, S.,  
1260 Wong, P., Sheng, Z., Petrovas, C., et al. (2015). Quality and quantity of TFH cells are critical for broad  
1261 antibody development in SHIVAD8 infection. *Sci Transl Med* *7*, 298ra120-298ra120.
- 1262 Ye, J., Ma, N., Madden, T.L., and Ostell, J.M. (2013). IgBLAST: an immunoglobulin variable domain  
1263 sequence analysis tool. *Nucleic Acids Res.* *41*, W34-W40.
- 1264 Yeh, C.-H., Nojima, T., Kuraoka, M., and Kelsoe, G. (2018). Germinal center entry not selection of B cells  
1265 is controlled by peptide-MHCII complex density. *Nat Commun* *9*, 928.
- 1266 Zhou, T., Doria-Rose, N.A., Cheng, C., Stewart-Jones, G.B.E., Chuang, G.-Y., Chambers, M., Druz, A.,  
1267 Geng, H., McKee, K., Kwon, Y.D., et al. (2017). Quantification of the Impact of the HIV-1-Glycan Shield  
1268 on Antibody Elicitation. *Cell Rep* *19*, 719-732.

1269 **FIGURE LEGENDS**

1270 **Figure 1. Sustained delivery immunization enhances germinal center (GC) B cell responses.**

1271 (A) Immunization and sampling schedule of first immunization. Bolus Grp2, 2w pumps, and 4w pump  
1272 groups were immunized and sampled at the same time. Bolus Grp1 were immunized and sampled at a  
1273 later time. Bolus Grps 1 and 2 data have been pooled.

1274 (B) Representative flow cytometry gate of GC B cells, gated on viable CD20<sup>+</sup> B cells pre- and post-  
1275 immunization. See **Fig S1** for full gating strategy.

1276 (C) GC B cell frequencies over time. Black circles are time points when bolus groups have been pooled  
1277 (n = 9), grey circles (n =6). 2 week pump and 4 week osmotic pump groups have been pooled in all  
1278 analyses. GC B cells were quantified as Bcl6<sup>+</sup> Ki67<sup>+</sup> at weeks 1- 6, and 8. At week 7, GC B cells were  
1279 defined as CD38<sup>-</sup> CD71<sup>+</sup> (see **Fig S1** for gating).

1280 (D) Cumulative GC B cell responses to immunization within individual LNs at weeks 1, 3-7 [AUC].

1281 (E) Representative flow cytometry gate of Env-specific B cells pre- and post-immunization. Env-specific  
1282 cells are gated as Env<sub>AX647</sub><sup>+</sup> Env<sub>BV421</sub><sup>+</sup> (IgM<sup>+</sup> IgG<sup>+</sup>)<sup>-</sup> CD20<sup>+</sup> CD3<sup>-</sup> cells.

1283 (F) Env-specific B cell frequencies over time.

1284 (G) Cumulative Env-specific B cell responses within individual LNs at weeks 1, 3-7 [AUC].

1285 (H) Representative flow cytometry gating of Env-specific GC B cells pre- and post-immunization. Cells  
1286 are gated as Env<sub>AX647</sub><sup>+</sup> Env<sub>BV421</sub><sup>+</sup> of Bcl6<sup>+</sup> Ki67<sup>+</sup> (IgM<sup>+</sup> IgG<sup>+</sup>)<sup>-</sup> CD20<sup>+</sup> CD3<sup>-</sup> or Env<sub>AX647</sub><sup>+</sup> Env<sub>BV421</sub><sup>+</sup> of CD38<sup>-</sup>  
1287 CD71<sup>+</sup> (IgM<sup>+</sup> IgG<sup>+</sup>)<sup>-</sup> CD20<sup>+</sup> CD3<sup>-</sup>.

1288 (I) Quantification of Env-specific GC B cells, quantified as percentage of total GC B cells, over time.

1289 (J) Cumulative Env-specific GC B cell responses within individual LNs at weeks 1, 3-7 [AUC].

1290 (K) Quantification of Env-specific GC B cells, quantified as percentage of total B cells, over time.

1291 (L) Cumulative Env-specific GC B cell responses within individual LNs at weeks 1, 3-7 [AUC].

1292 (M) Flow cytometry gate of high-affinity Env-specific GC B cells over one immunization within an  
1293 individual LN.

1294 (N) Frequencies of high-affinity Env-specific GC B cell, quantified as percentage of total B cells, over  
1295 time.

1296 (O) Cumulative high-affinity Env-specific GC B cell responses within individual LNs at weeks 1, 3-7 [AUC].

1297 (P) Quantification of high-affinity memory B cells over time. Memory B cells were calculated as non-GC  
1298 (Bcl6<sup>-</sup> Ki67<sup>-</sup> or CD38<sup>+</sup> CD71<sup>-</sup>) high-affinity Env-specific B cells.

1299 (Q) Cumulative high-affinity memory B cell responses within individual LNs at weeks 1, 3-7 [AUC].

1300 Mean  $\pm$  SEM are graphed. Statistical significance tested using unpaired, two-tailed Mann-Whitney U  
1301 tests. \* $p \leq 0.05$ , \*\* $p \leq 0.01$ . \*\*\* $p \leq 0.001$ , \*\*\*\* $p \leq 0.0001$

1302

1303 **Figure 2. Sustained delivery immunization enhances GC Tfh responses.**

1304 (A) Representative flow cytometry gate of GC Tfh, gated on CD4<sup>+</sup> T cells. See **Fig S2** for full gating  
1305 strategy.

1306 (B) Quantification of GC Tfh cells over time.

1307 (C) Cumulative GC Tfh cell response to Env immunization between at weeks 1, 3-6 [AUC].

1308 Mean  $\pm$  SEM are graphed. Statistical significance tested using unpaired, two-tailed Mann-Whitney U test.

1309 \*\* $p \leq 0.01$ . \*\*\* $p \leq 0.001$

1310

1311 **Figure 3. Germinal center responses following 2<sup>nd</sup> Env trimer immunization.**

1312 (A) Immunization and sampling schedule of 2<sup>nd</sup> immunization. All groups were immunized and sampled  
1313 contemporaneously.

1314 (B) Frequencies of total GC B cells over time, gated as per **Fig 1B**.

1315 (C) Env-specific B cell frequencies over time, gated as per **Fig 1E** and **S1F**.

1316 (D) Frequencies of high-affinity Env-specific B cells over time, gated as per **Fig S1I**.

1317 (E) Quantification of Env-specific GC B cells over time, as gated per **Fig 1H** and **S1G**.

1318 (F) Quantification of high-affinity Env-specific GC B cells over time, as gated per **Fig 1M** and **S1K**.

1319 (G) GC Tfh frequencies after second immunization, gated as per **Fig 2A**.

1320 (H) Cumulative GC Tfh cell responses in response to the Env booster immunization within individual LNs  
1321 between weeks 9 and 12 [AUC].

1322 (I) Representative flow cytometry plots of Env-specific CD4 T cells, gated on viable CD4<sup>+</sup> T cells. LN cells  
1323 were left unstimulated or stimulated with a pool of overlapping peptides spanning Olio6-CD4ko (Env).  
1324 SEB is shown as a positive control. Frequencies are background-subtracted

1325 (J) Quantification of Env-specific CD4<sup>+</sup> T cells at week 12 (bolus) or week 14 (pumps).

1326 (K) Representative flow cytometry gating of GC Tfh, mantle (m)Tfh and nonTfh subsets.

1327 (L) Flow cytometry plots of AIM<sub>OB</sub> assay, gated on GC Tfh, mTfh or nonTfh cells.

1328 (M) Quantification of Env-specific CD4<sup>+</sup> T cells by subset.

1329 Mean  $\pm$  SEM are graphed. Statistical significance tested using unpaired, two-tailed Mann-Whitney U test.

1330 \* $p \leq 0.05$ , \*\* $p \leq 0.01$ , \*\*\* $p \leq 0.001$

1331 **Figure 4. Sustained delivery immunization induces higher nAb titers than conventional**  
1332 **immunization.**

1333 (A) Env (BG505) trimer binding IgG titers over time.

1334 (B) Anti-his IgG binding titers over time.

1335 (C) BG505 N332 nAb titers over time.

1336 (D) Peak BG505 N332 nAb titers after two immunizations.

1337 (E) Neutralization breadth on a 12 virus panel, representing global antigenic diversity, at week 10 (bolus),  
1338 12 (2w pumps) and 14 (4w pumps).

1339 All data represent geometric mean titers  $\pm$  geometric SD. Statistical significance tested using unpaired,  
1340 two-tailed Mann-Whitney U test. \* $p \leq 0.05$

1341

1342 **Figure 5. Immunoglobulin germline annotations using long-read genomic DNA sequencing**

1343 (A) Locus and high-level assembly summaries for the three primary Ig loci in RM.

1344 (B) An example region in the IGL locus, in which PacBio primary contig assemblies resolved existing  
1345 gaps in the current RM reference genome (rheMac8). Contig sequences spanning these gaps resulted  
1346 in an increase in the number of known mapped IGLV loci. The inset provides an example of PacBio reads  
1347 representing the current assembly that span the largest of these gaps, revealing high and consistent  
1348 read coverage, with multiple reads spanning three of the novel genes displayed.

1349 (C) Overview of V gene allelic variant discovery process. PacBio reads overlapping ORF annotations on  
1350 primary contigs were assessed for the presence of SNPs. At ORF loci determined to be heterozygous,  
1351 SNPs were used to partition reads for local allele-specific assemblies.

1352 (D) SNPs within and near genes (red boxes) were used to partition PacBio reads to each respective  
1353 haplotype, allowing for the identification of heterozygous and homozygous gene segments. Following  
1354 this approach, an additional alternative *IGLV2.29* allele was found by mapping PacBio reads to the  
1355 primary contigs (left); in contrast, reads overlapping *IGLV2.10* provide evidence for the presence of  
1356 identical alleles on both homologous chromosomes.

1357 (E) Counts of annotations from primary contigs and alternate alleles identified from PacBio reads using  
1358 the method described in (C) and (D).

1359 (F) The proportions of IGHV, IGKV, and IGLV genes/alleles annotated from PacBio assembly data that  
1360 are present in IMGT and NCBI repositories.

1361 (G) Counts of IGHV, IGKV, and IGLV gene loci (partitioned by subfamily) annotated from the current  
1362 PacBio primary contig assemblies, compared to the equivalent counts of known gene loci in human.  
1363 (H) Quantification of total number of IgG, IgL and IgK lineages of Env-specific B cells. Each data point is  
1364 an individual LN. Env-specific B cells were sorted from bolus immunized animals at week 12 and pump  
1365 immunized animals at week 14.  
1366 (I) Phylogenetic analysis of an Ag-specific lineage found in both LNs in a single animal. Blue, left LN; Red,  
1367 right LN. Size of dot represents number of reads with that sequence.  
1368 (J) Percentage of lineages shared between R and L LN within a given animal.  
1369 (K) Violin plots of mutation frequencies in (B) IGHV or (C) IGLV. Black dot is mean.  
1370 Mean  $\pm$  SEM are graphed. \* $p \leq 0.05$ , \*\* $p \leq 0.01$ , \*\*\* $p \leq 0.001$

1371

1372 **Figure 6. Sustained immunization shifts immunodominance.**

1373 Percentage of (A) IGHV or (B) IGLV use by antigen-specific B cells within a lymph node. Each data point  
1374 is single LN. Mean  $\pm$  SEM are graphed. \* $q < 0.05$ , \*\*\*\* $q < 0.0001$ , FDR = 5%.

1375 (C) Phylogenetic tree of a single IGLV3.15-utilizing lineage. Blue, left LN; Red, right LN. Size of dot  
1376 represents number of reads with that sequence.

1377 (D) The base of the Env trimer is not exposed on the surface of the virion. Soluble trimer used in  
1378 immunizations allows access of the base to B cells. Glycans on the surface of the trimer restrict access of  
1379 B cells to proteinaceous surface.

1380 (E) Binding curves of BDA1 and bnAbs to BG505 Env trimer.

1381 (F) Binding curves of BDA1 and bnAbs to gp120 monomer.

1382 (G) Cross-competition ELISA assay. BDA1, base-directed antibody utilizing IGLV3.15 isolated from a  
1383 bolus immunized animal at w7. 19R is a base-binding antibody isolated from an immunized RM. PGT121  
1384 is a bnAb targeting the N332 epitope towards the top of the trimer. 19R fab, PGT121 fab and BDA1  
1385 whole antibody were used in this assay. Data shown are representative of two experiments, each  
1386 performed in duplicate.

1387 (H) 3D EM reconstruction of BDA1 Fab (blue) in complex with BG505 SOSIPv5.2 Env trimer.

1388 (I) Composite 3D reconstruction of Env trimer bound to Fabs isolated from sera of all animals after two  
1389 immunizations, as determined by polyclonal EM analysis. Numbers of individual animals with Fab that  
1390 binds region are listed. Base (purple), N355 (light blue), C3/V5 (dark blue), fusion peptide (orange), apex  
1391 (green). Apex specific fab is depicted as transparent because fabs with this specificity were rare, but

1392 present. 3D EM reconstructions for plasma antibodies from individual animals can be seen in **Figure S7**.

1393

1394 **Figure 7. Dose escalating immunization strategy results in higher nAb titers.**

1395 (A) Immunization and sampling schedule. Groups were immunized and sampled at the same time.

1396 (B) Quantification of total GC B frequencies over time. Data from bolus grp2 at w3, 5, and 7 (Fig 1) are  
1397 included in these analyses (grey circles).

1398 (C) Cumulative GC B cell responses to the first immunization [AUC]. AUC was calculated between w3-7.

1399 (D) Quantification of Env-specific GC B cells frequencies over time.

1400 (E) Cumulative Env-specific GC B cell responses to the first immunization [AUC].

1401 (F) Quantification of total GC Tfh cell frequencies over time.

1402 (G) Cumulative GC Tfh responses to the first immunization [AUC].

1403 (H) Quantification of Env-specific CD4<sup>+</sup> responses after 1 immunization.

1404 (I) Ratio of Env<sup>+</sup> GC B cells to Env-specific GC Tfh at w5, calculated as Env<sup>+</sup> GC B cells (% B cells)/ Env-  
1405 specific GC Tfh (% CD4<sup>+</sup>).

1406 (J) Total BG505 Env trimer binding IgG titers over time.

1407 (K) BG505 N332 nAb titers over time.

1408 (L) Peak BG505 N332 nAb titers after three immunizations.

1409 (M) Correlation between peak GC Tfh and GC B cells frequencies during 1<sup>st</sup> immunization. Data is from  
1410 both studies.

1411 (N) Correlation between Env<sup>+</sup> GC B cells (% B cells) and peak neutralization titers. Env<sup>+</sup> GC B cell values  
1412 are from w7 or peak frequencies during 1<sup>st</sup> immunization. Peak neutralization titers are after 2<sup>nd</sup>  
1413 immunization.

1414 (O) Histology of inguinal LNs from RMs immunized with Env<sub>AX647</sub> (Alexa647-labelled MD39) and ISCOMs-  
1415 class adjuvant via conventional bolus (n = 3), 2 week osmotic pump as per Fig 1A (n = 3) or an escalating  
1416 dose regimen as per Fig 7A (n = 3). LNs were harvested 2 days after the end of the immunization (bolus,  
1417 d2; pump, d16; ED, d14). Green, Env; red, CD35; blue, Ki67. Scale bars, 250µm.

1418 (P) Model of GC response in conventional immunization vs. slow delivery. Slow delivery immunization  
1419 likely alters early (~d1-d7) activation and differentiation of Tfh cells and activation and recruitment of a  
1420 diverse set of B cells. Greater GC Tfh help supports a wider repertoire of B cells, which is more likely to  
1421 contain nAb precursors, later in the response (w3-7). Antigen delivered via conventional bolus  
1422 immunization can be subject to degradative processes and nonnative forms of antigen can be presented



1423 by FDCs late in the response, while pumps protect the antigen prior to release. IC formation is enhanced  
1424 to slow delivery immunization.

1425 All BG505 binding and neutralization data represent geometric mean titers and  $\pm$  geometric SD. All cell-  
1426 frequency data represent mean and SEM. \* $p < 0.05$ , \*\* $p < 0.01$ , \*\*\* $p < 0.001$ , \*\*\*\* $p < 0.0001$

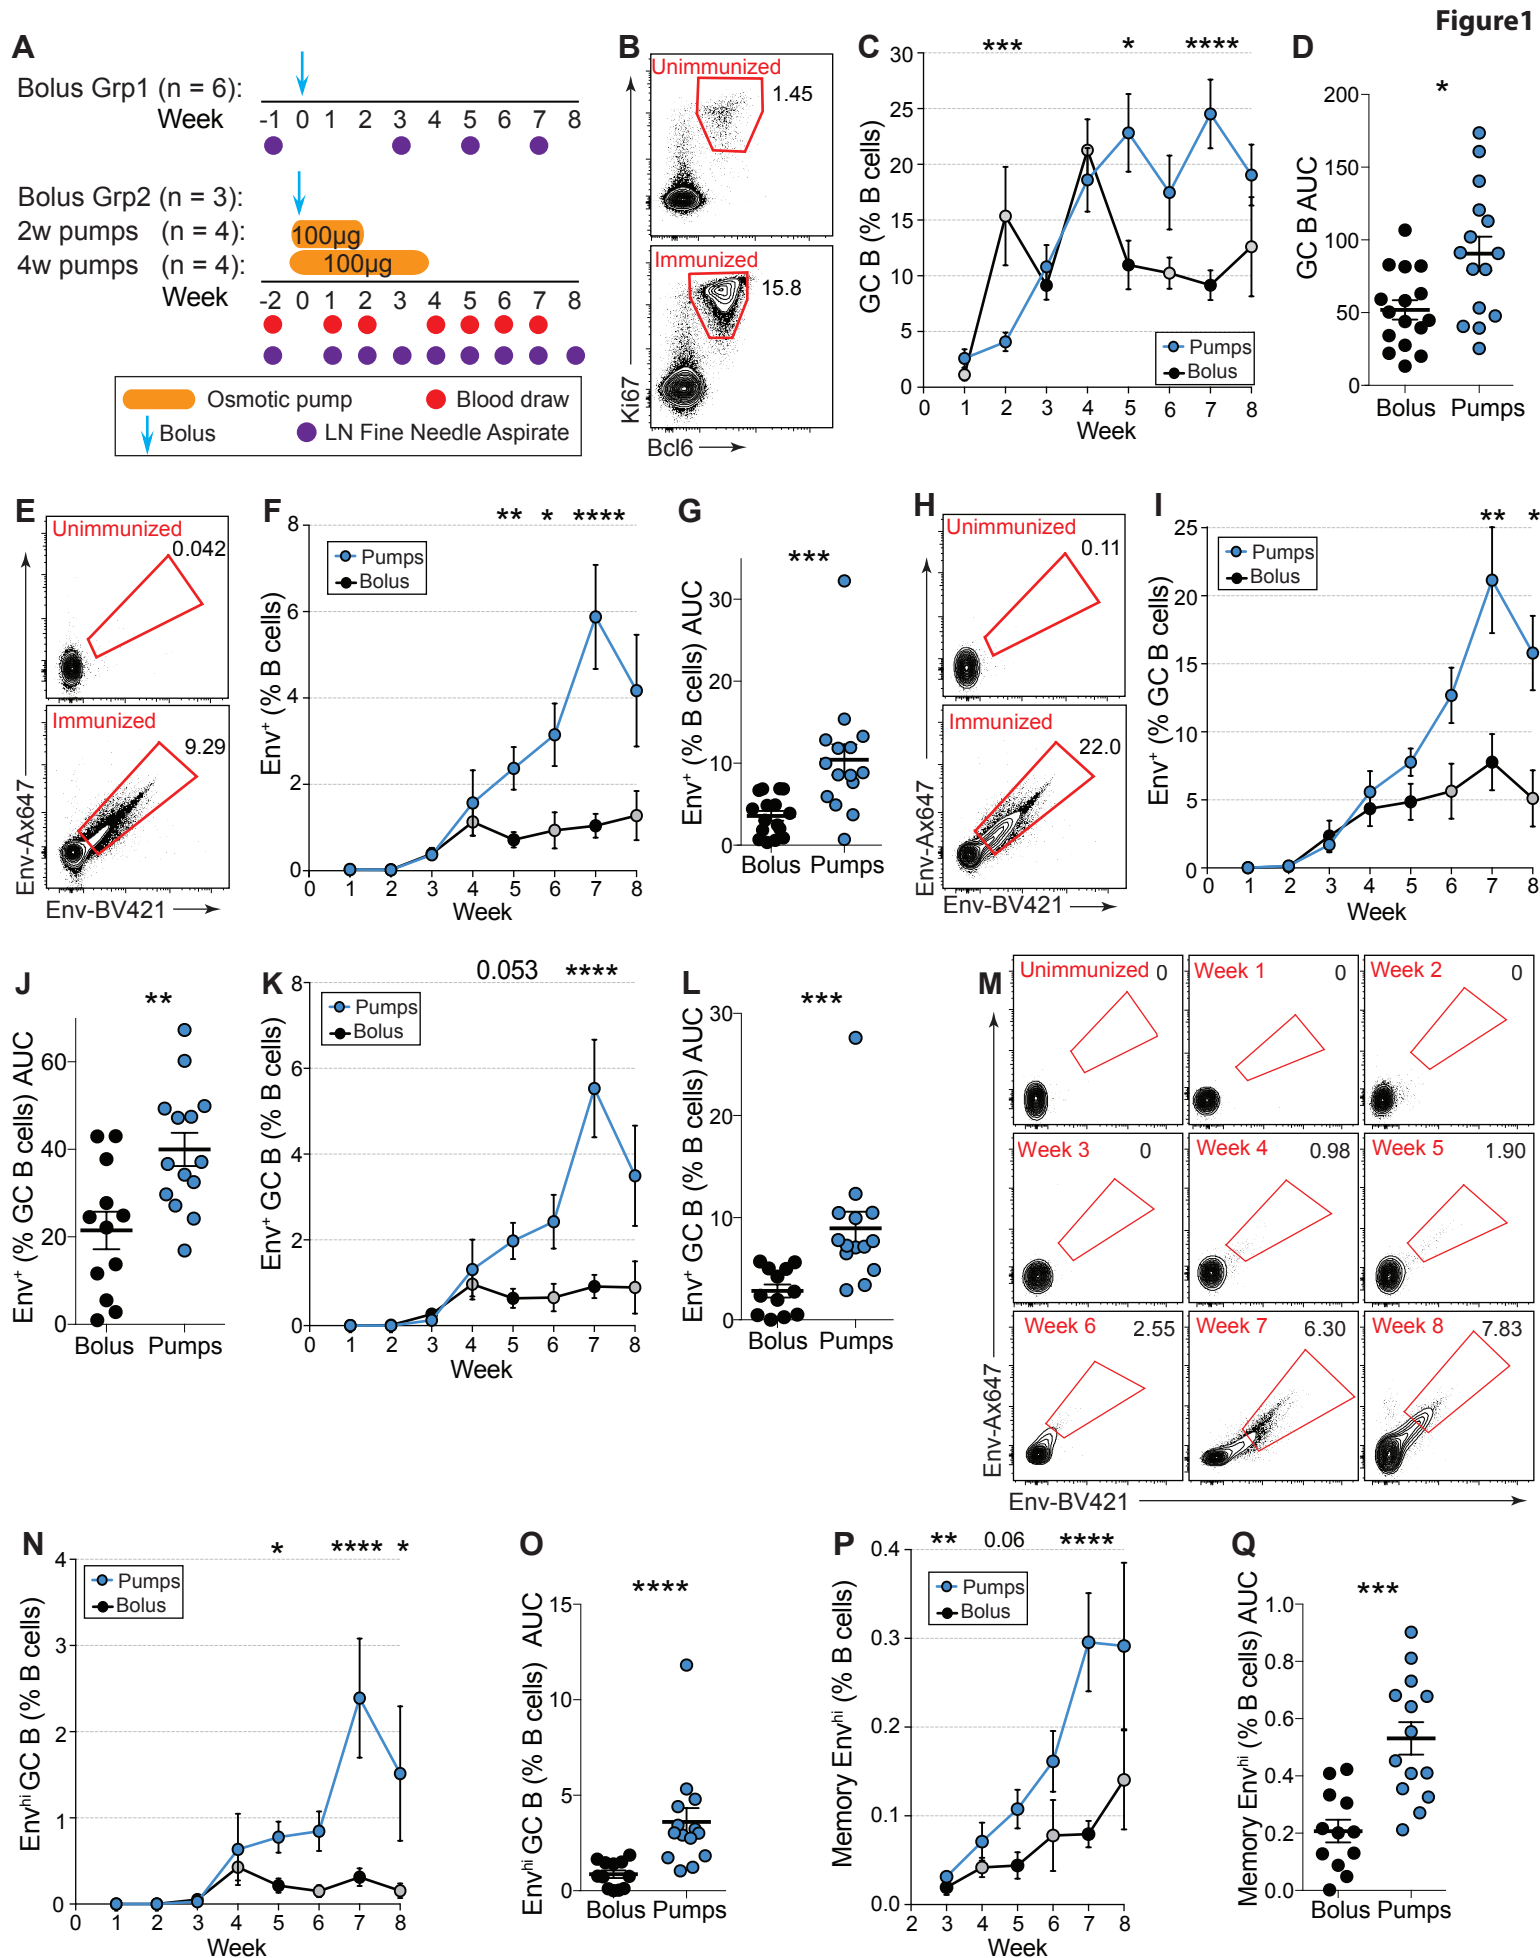

**Figure 2**

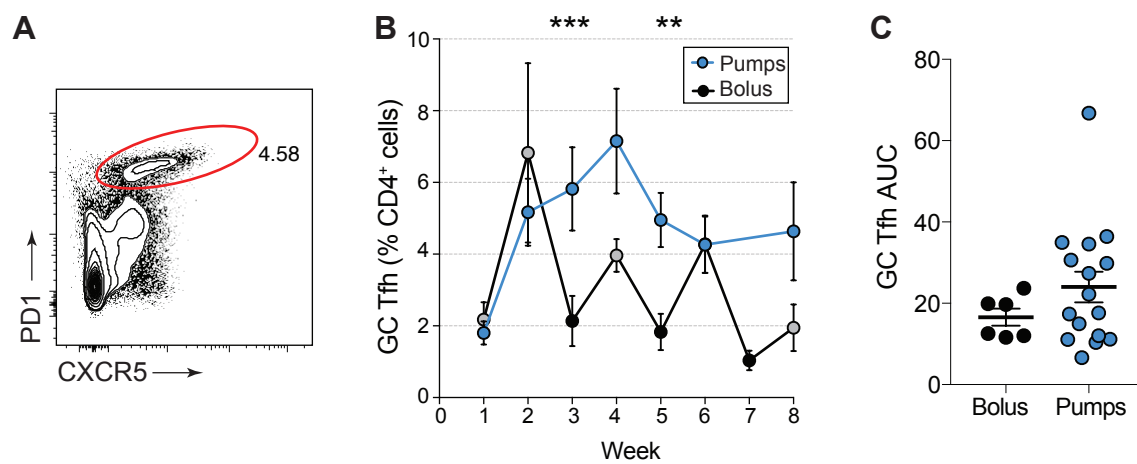

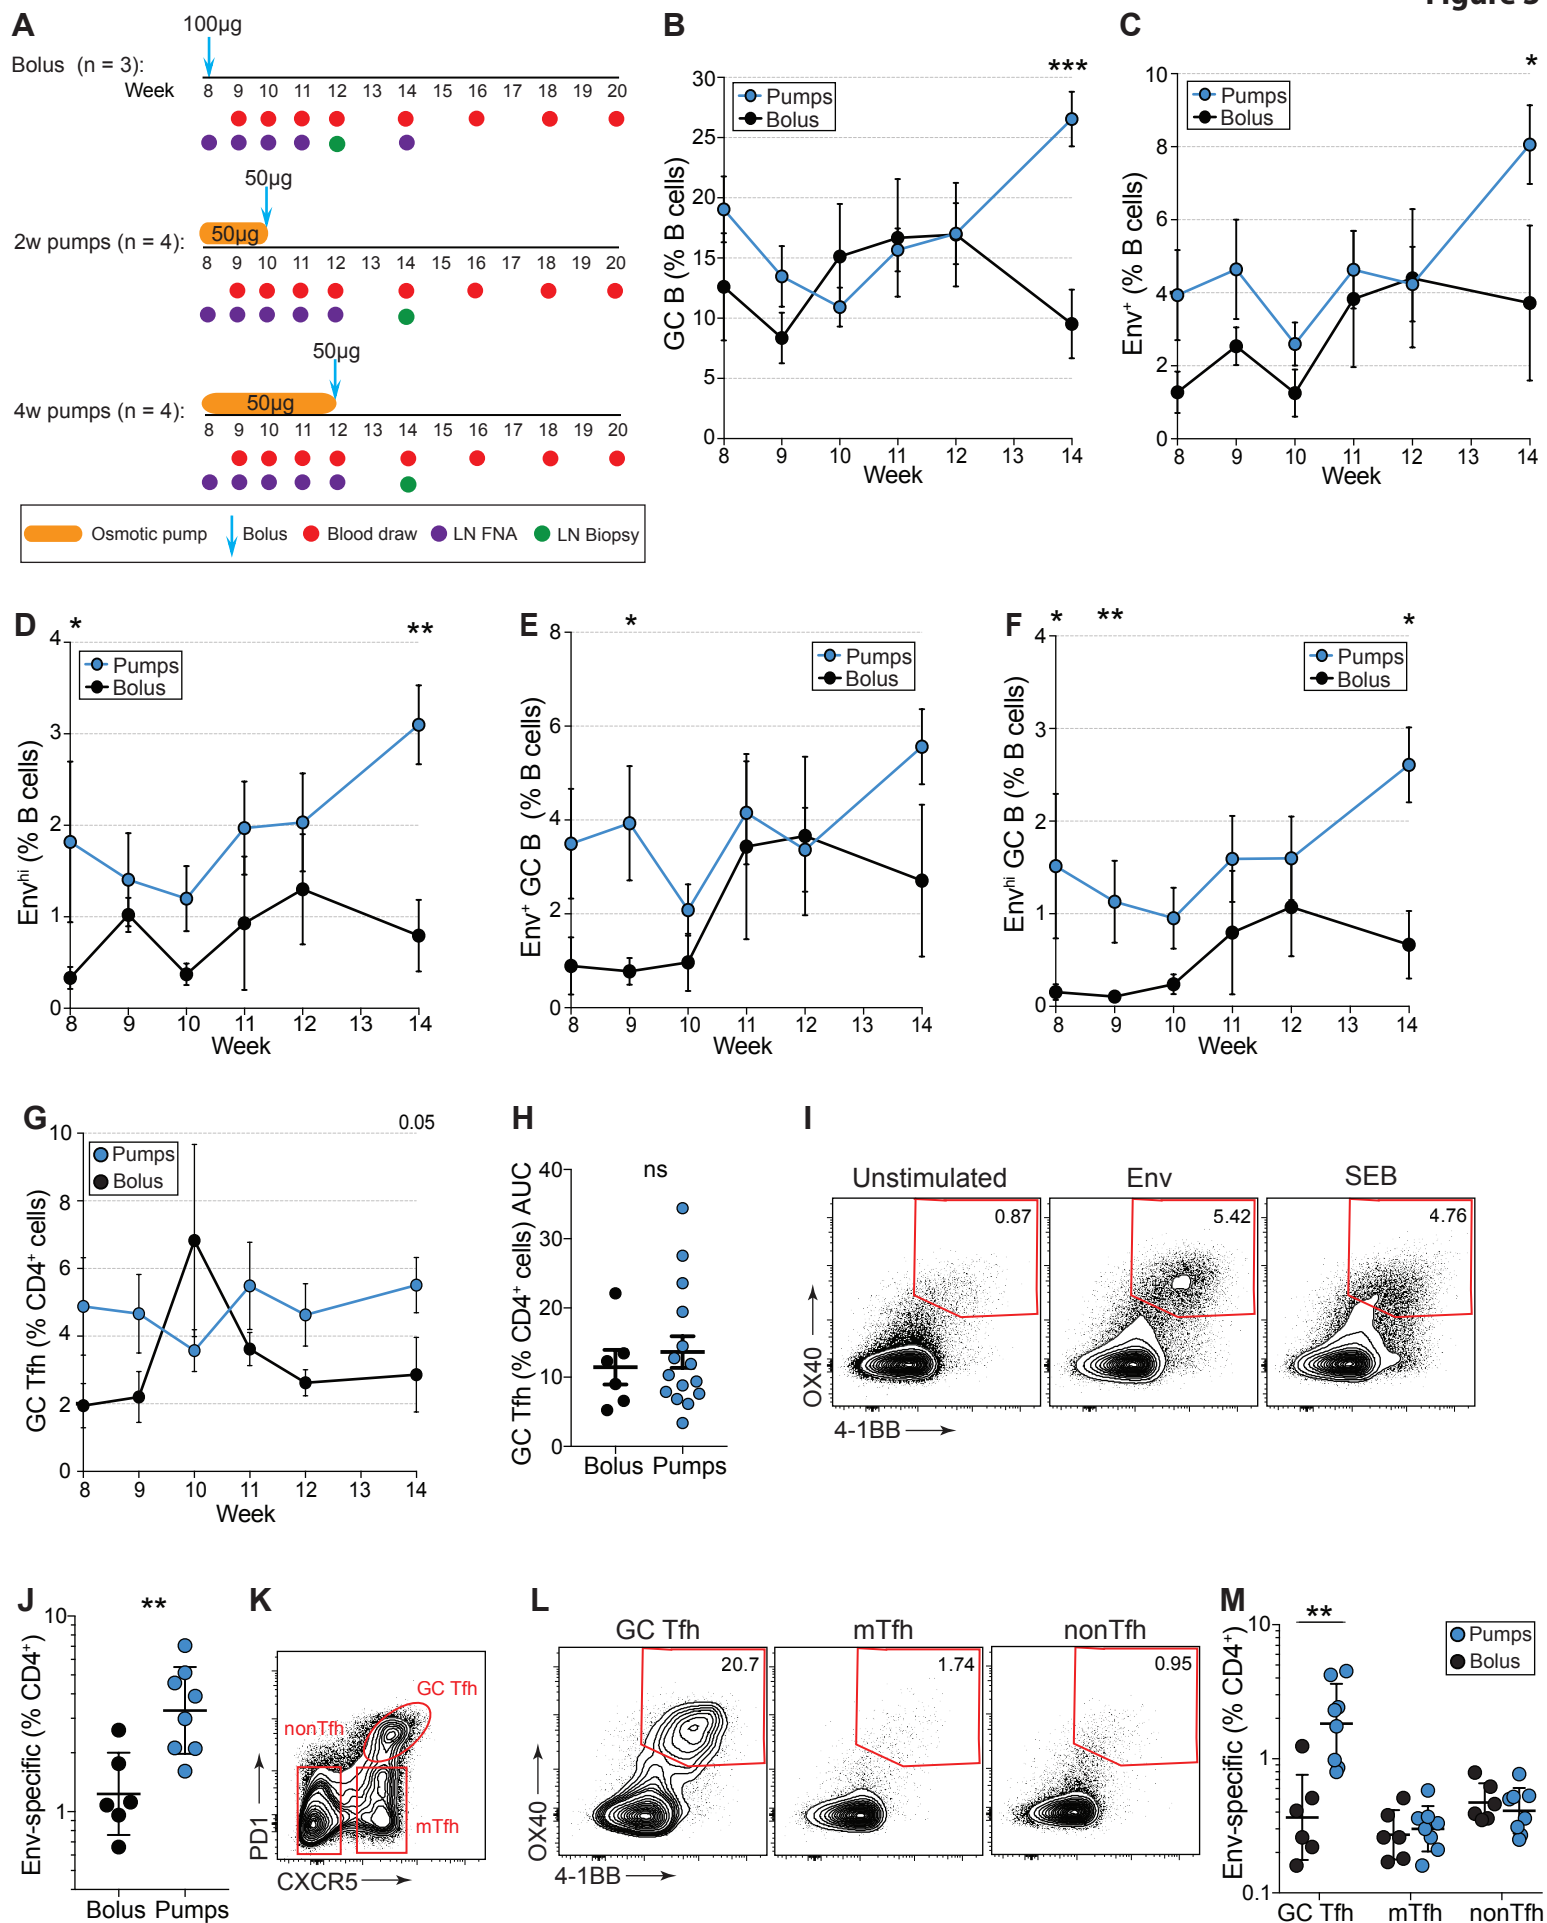

**Figure 4**

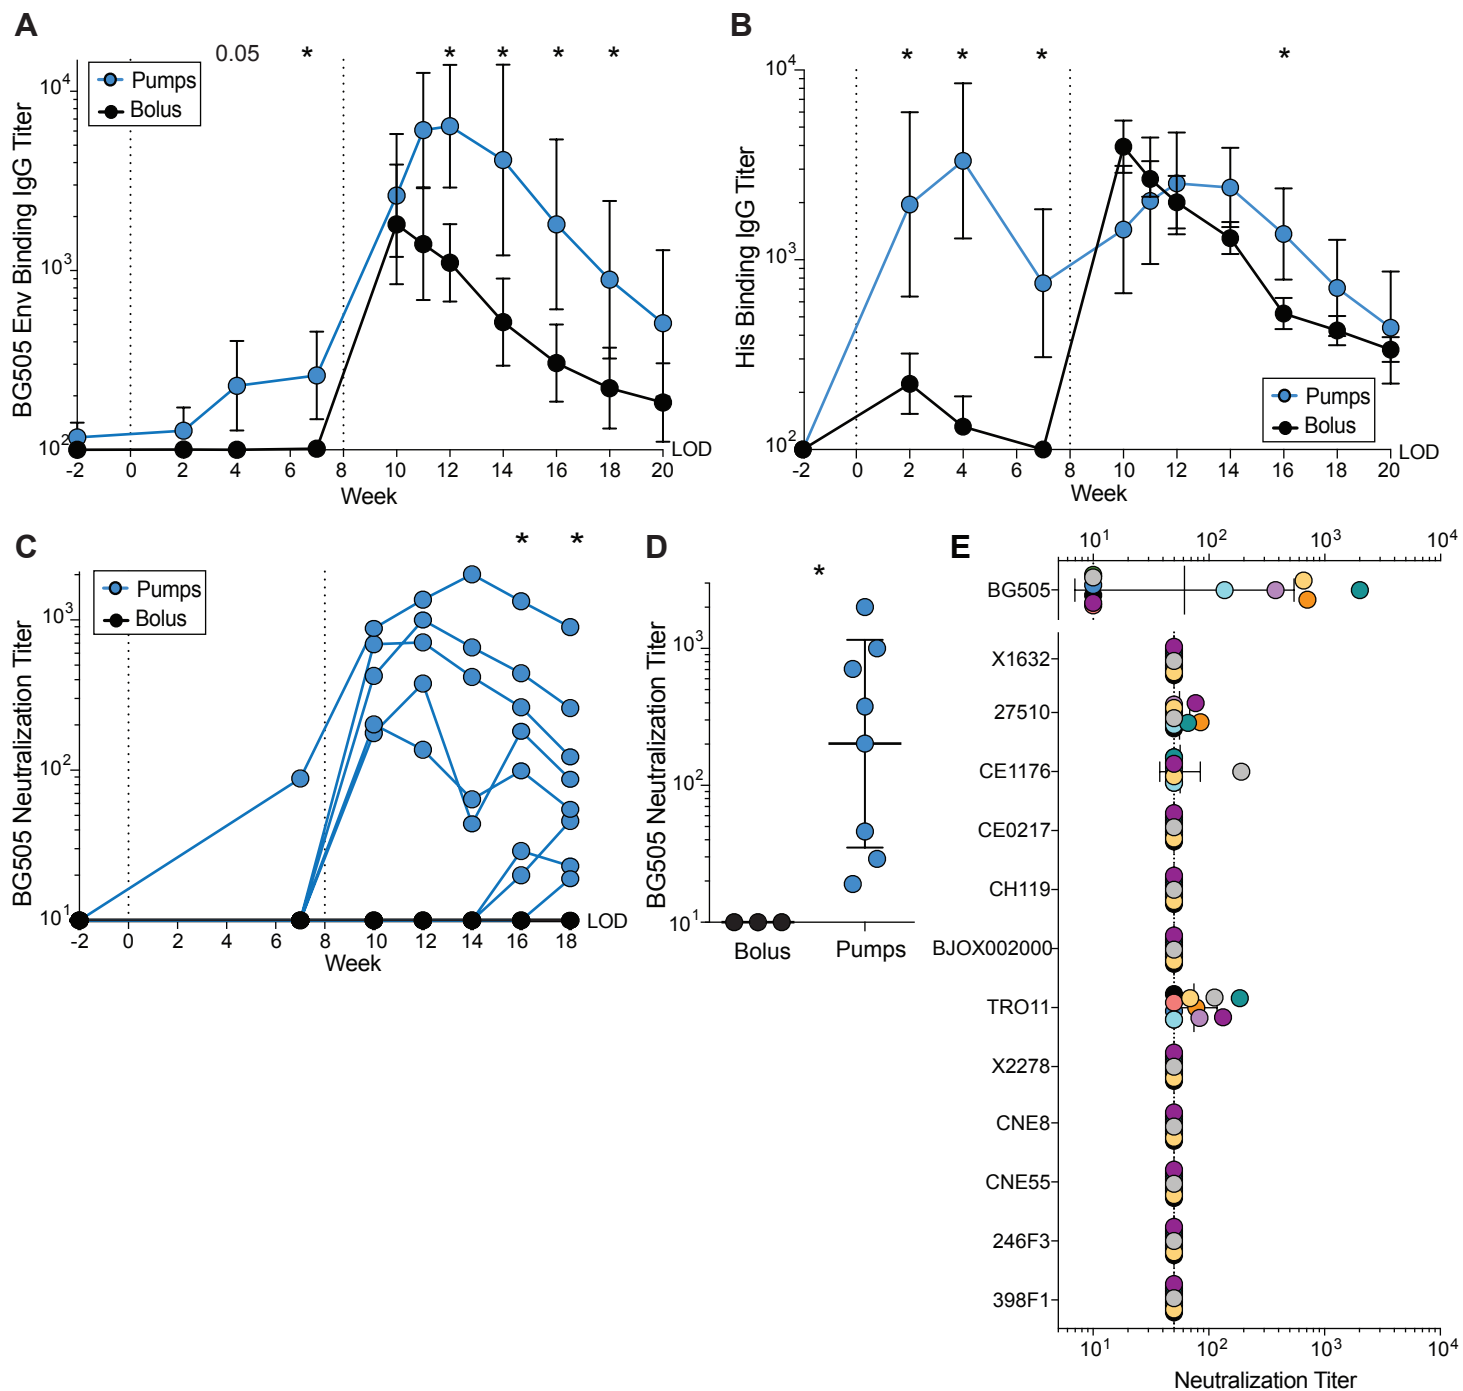

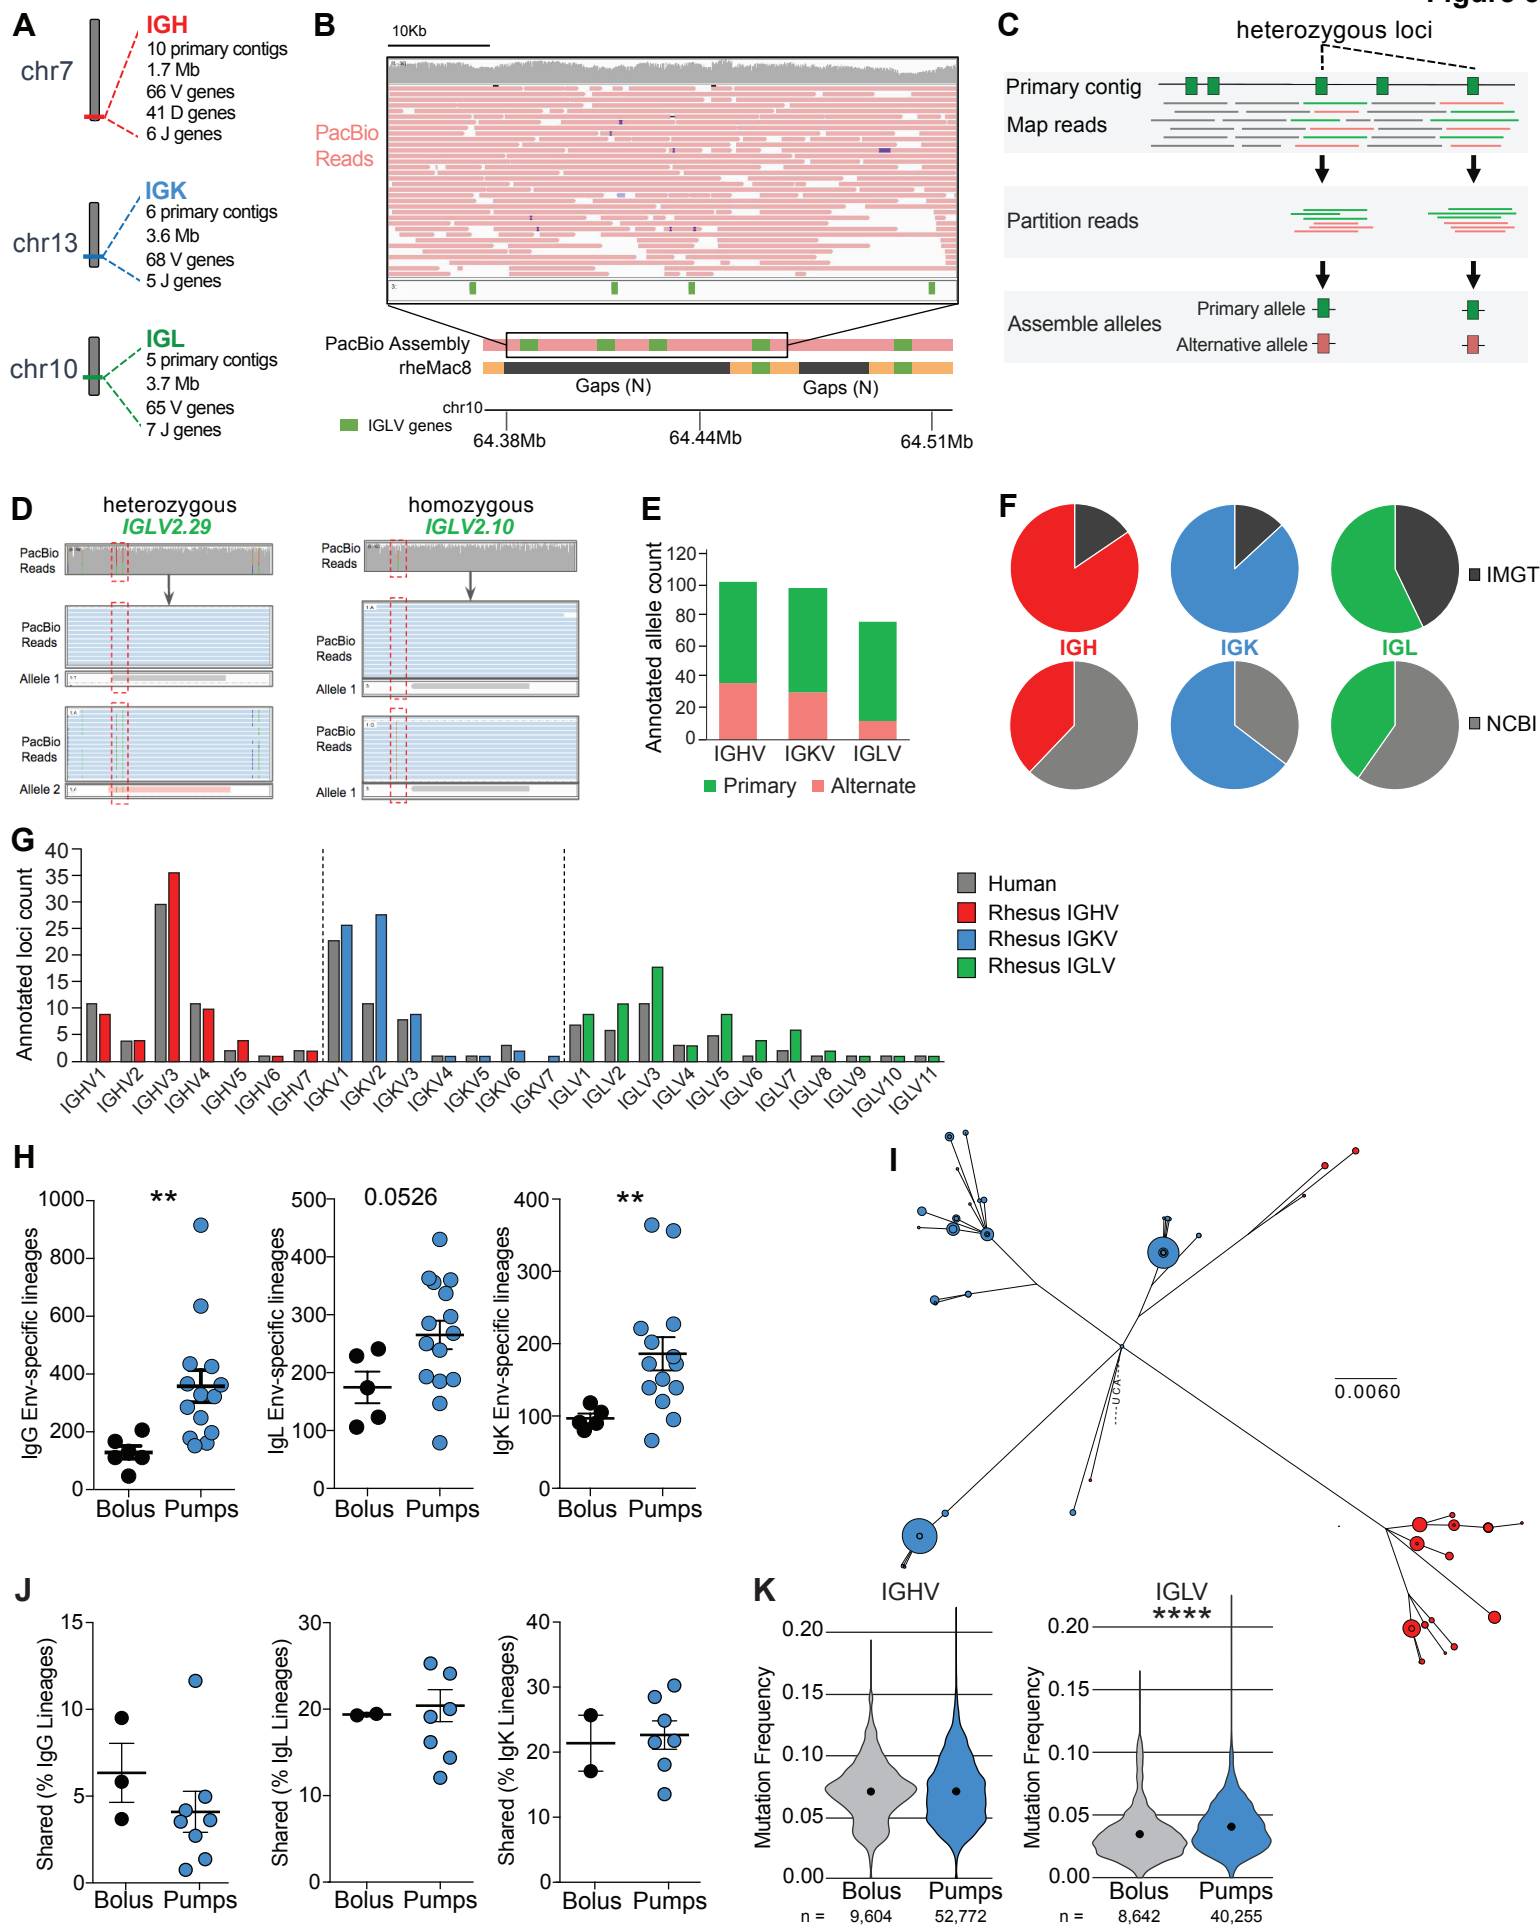

**Figure 6**

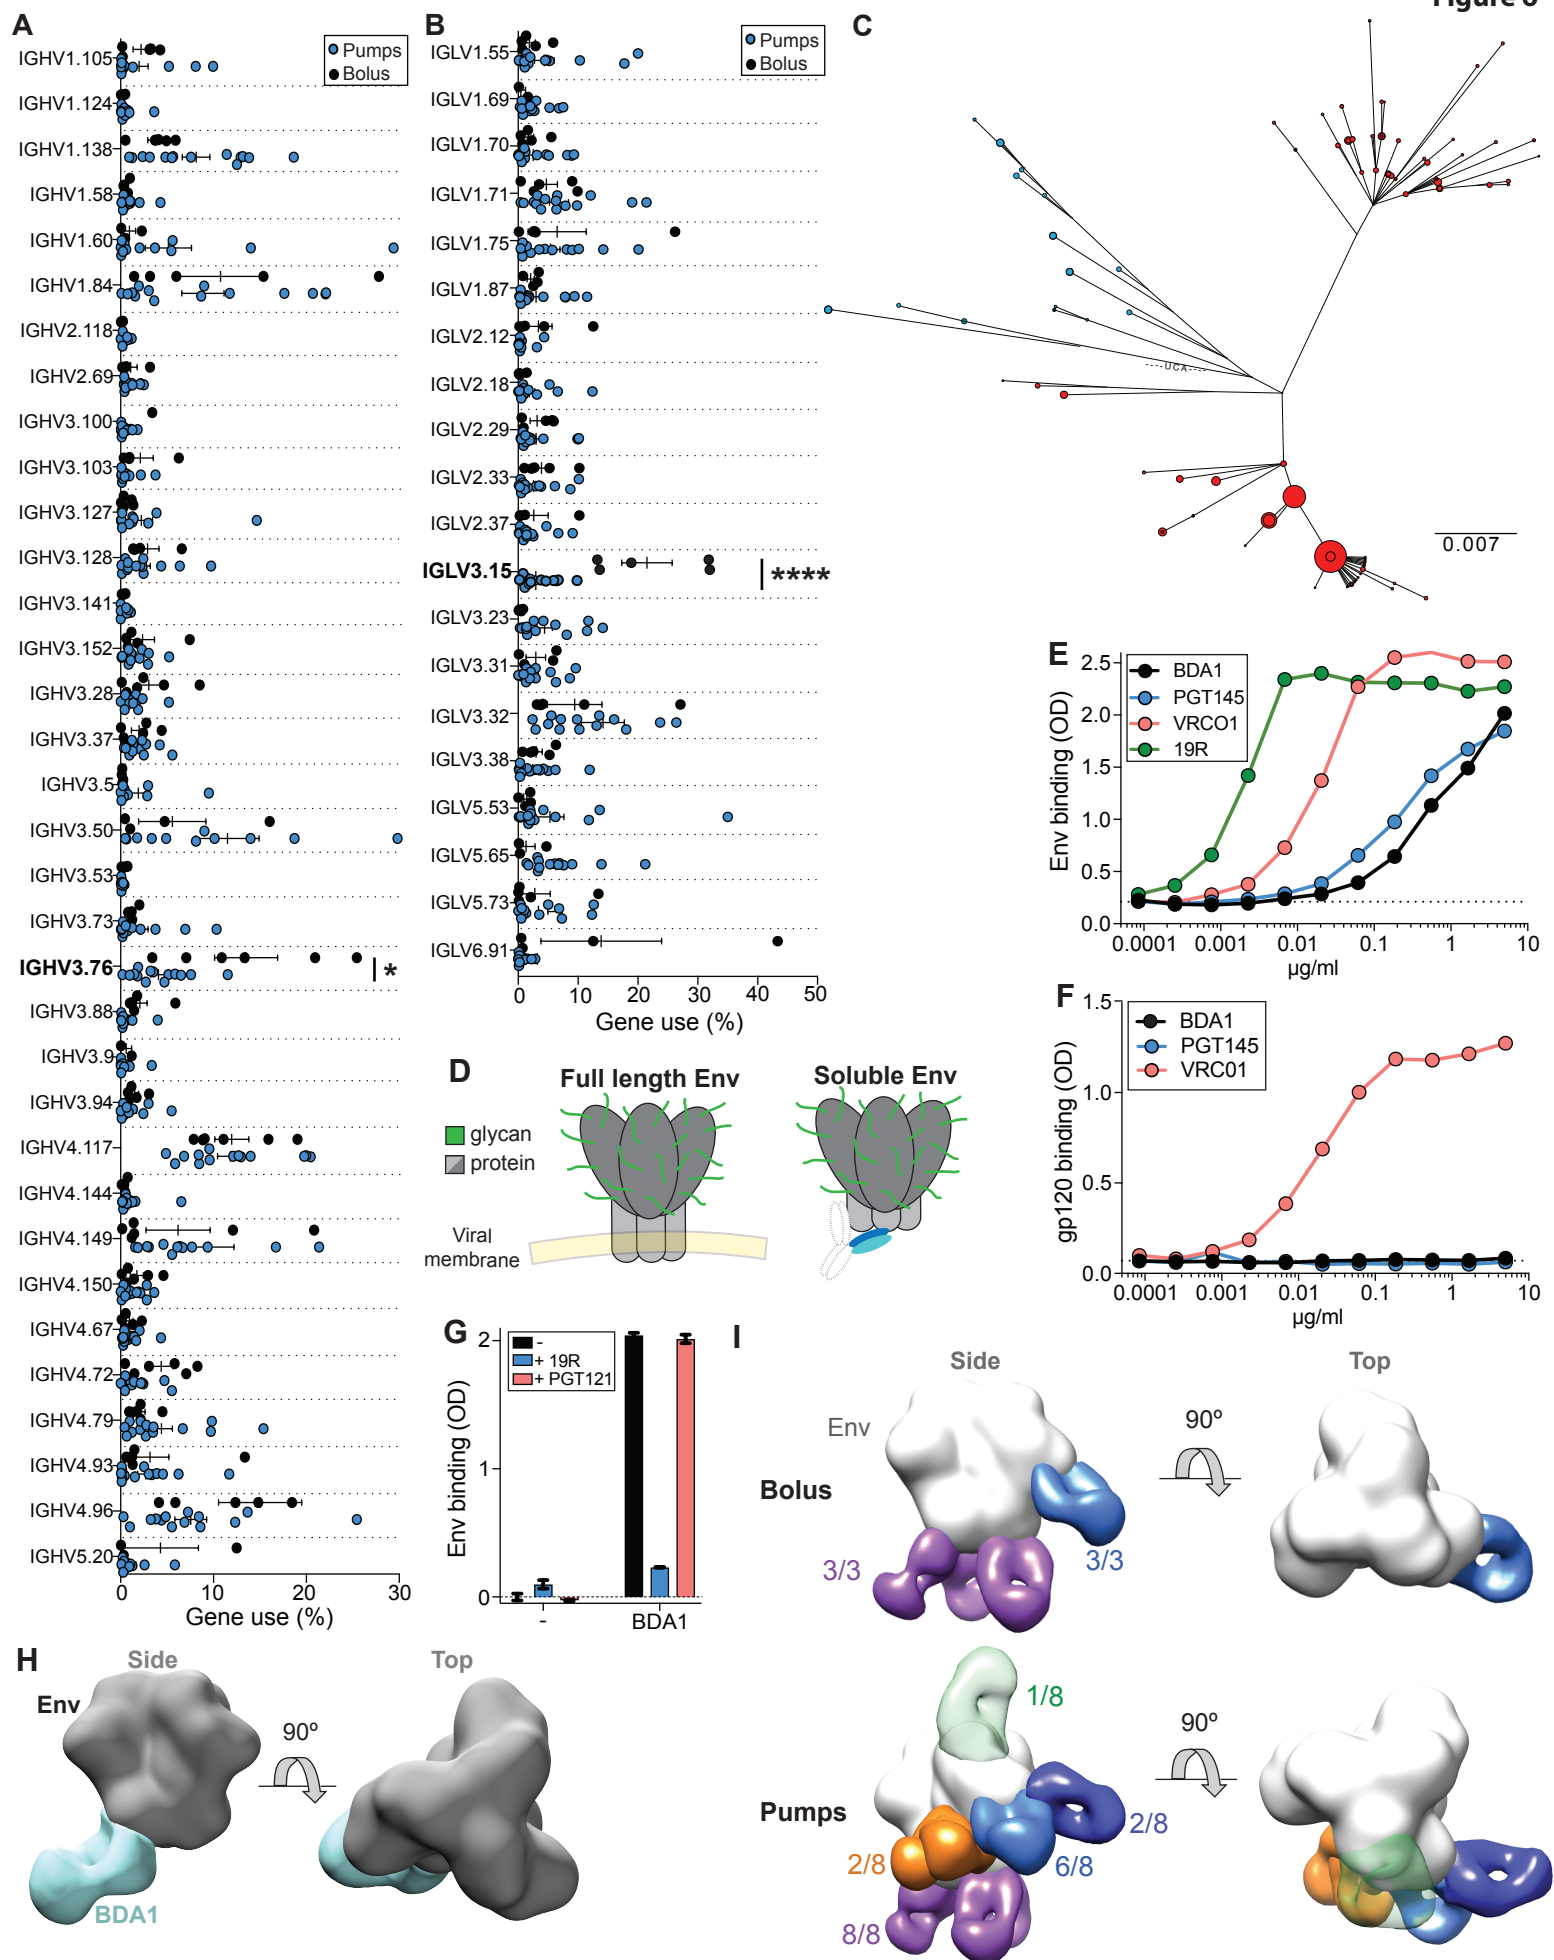

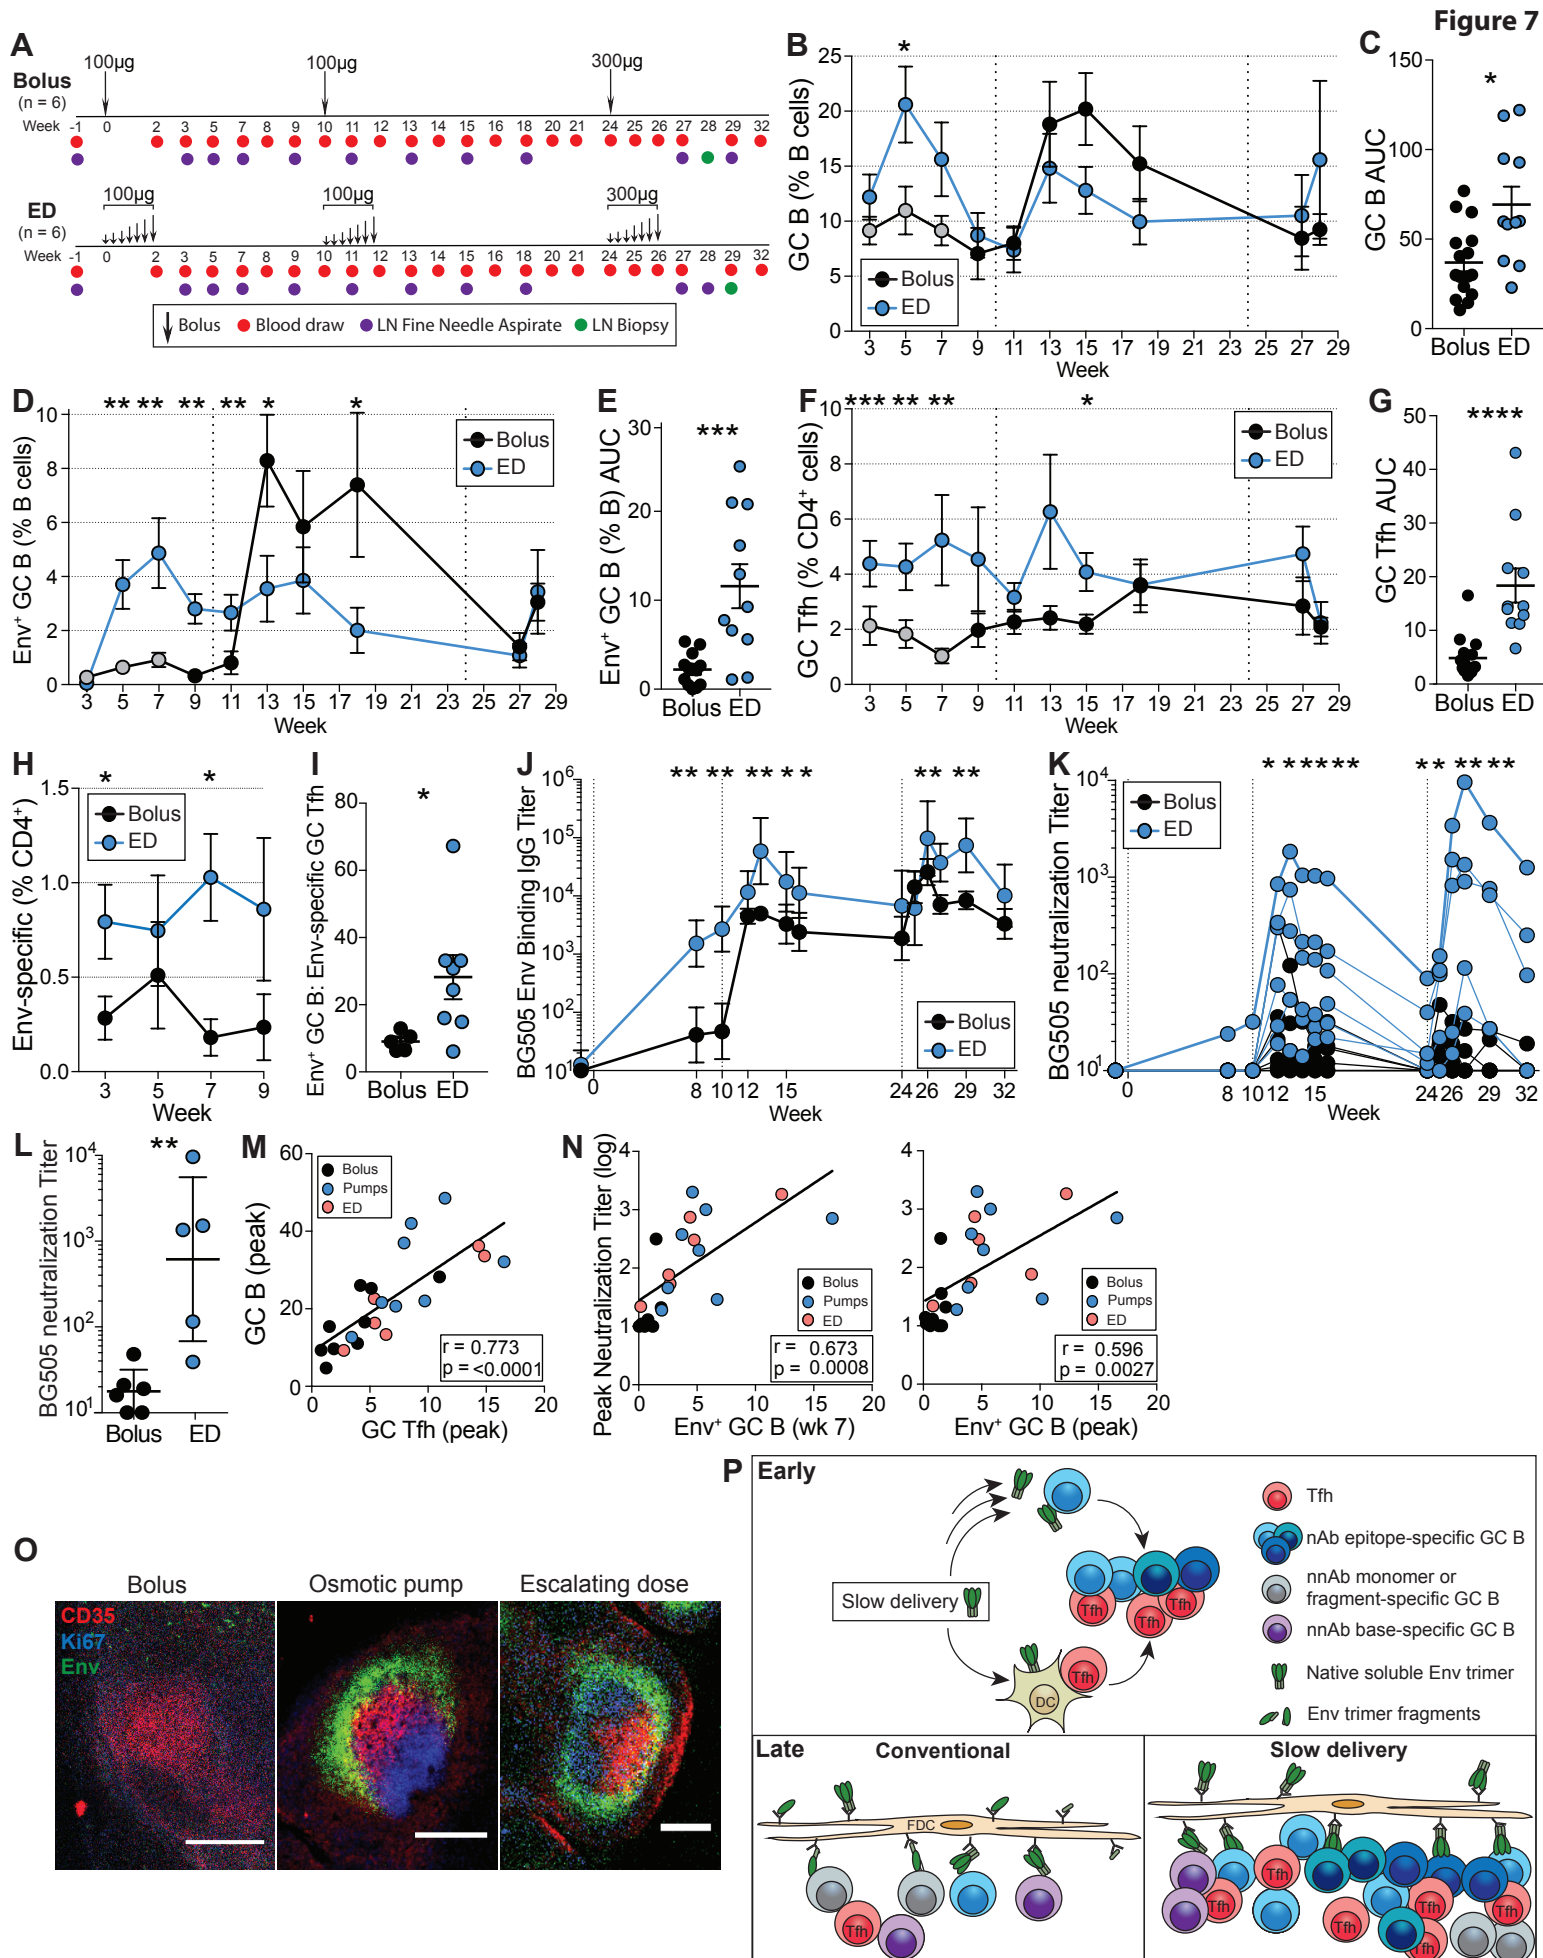

Source: https://biorxiv.org/content/biorxiv/early/2018/10/01/432666.full-text.pdf
